# Supplementary material for: Molecular pathology associated with altered synaptic transcriptome in the dorsolateral prefrontal cortex of depressed subjects
Source: PubMed Central journal article supplement (PMC7822869; doi:10.1038/s41398-020-01159-9), 2021-01-22
Supplement: 41398_2020_1159_MOESM1_ESM.pdf [file 41398_2020_1159_MOESM1_ESM.pdf]

## Supplementary Section

### **Molecular pathology associated with altered synaptic transcriptome in the dorsolateral prefrontal cortex of depressed subjects**

Yuta Yoshino,<sup>1</sup> Bhaskar Roy,<sup>1</sup> Nilesh Kumar,<sup>2</sup> M. Shahid Mukhtar,<sup>2</sup> Yogesh Dwivedi<sup>1\*</sup>

<sup>1</sup>Department of Psychiatry and Behavioral Neurobiology, University of Alabama at Birmingham, Birmingham, AL 35294, USA.

<sup>2</sup>Department of Biology, University of Alabama at Birmingham, Birmingham, AL 35294, USA.

**Running Title:** Synaptic transcriptome and MDD pathogenesis

**Keywords:** Human postmortem brain, dorsolateral prefrontal cortex, major depressive disorder, synaptosome, gene expression, transcriptome

**\*Corresponding author:**

Yogesh Dwivedi, Ph.D.  
Elesabeth Ridgely Shook Professor  
Director of Translational Research, UAB Mood Disorder Program  
Co-Director, Depression and Suicide Center  
Department of Psychiatry and Behavioral Neurobiology  
University of Alabama at Birmingham  
SC711 Sparks Center  
1720 7<sup>th</sup> Avenue South  
Birmingham, Alabama, USA

Phone: 01-205-975-8459

Email: [yogeshdwivedi@uabmc.edu](mailto:yogeshdwivedi@uabmc.edu)

**Table S1. Demographic and clinical characteristics of control and MDD subjects**

|                            | <b>Control</b>                                                                                                                                                                                   | <b>MDD</b>                                                                                                                                                      | <b>p-value</b> |
|----------------------------|--------------------------------------------------------------------------------------------------------------------------------------------------------------------------------------------------|-----------------------------------------------------------------------------------------------------------------------------------------------------------------|----------------|
| Number of subjects         | 15                                                                                                                                                                                               | 15                                                                                                                                                              | N/A            |
| Age (Year)                 | 57.0 ± 15.0                                                                                                                                                                                      | 57.9 ± 14.0                                                                                                                                                     | 0.87           |
| Gender                     | Male                                                                                                                                                                                             | 8                                                                                                                                                               | N/A            |
|                            | Female                                                                                                                                                                                           | 7                                                                                                                                                               |                |
| Postmortem interval (Hour) | 18.1 ± 6.0                                                                                                                                                                                       | 17.8 ± 6.8                                                                                                                                                      | 0.87           |
| Brain pH                   | 6.3 ± 0.8                                                                                                                                                                                        | 6.5 ± 0.5                                                                                                                                                       | 0.40           |
| Race (white: black:other)  | 14: 1: 0                                                                                                                                                                                         | 15: 0: 0                                                                                                                                                        | N/A            |
| Drug abuse                 | 0                                                                                                                                                                                                | 1                                                                                                                                                               | N/A            |
| Alcohol abuse              | 0                                                                                                                                                                                                | 3                                                                                                                                                               | N/A            |
| Antidepressant drugs       | 0                                                                                                                                                                                                | 6 (Amitriptyline, paroxetine, alprazolam, quetiapine, quetiapine quetiapine, doxepine, bupropion, trazodone)                                                    | N/A            |
| Suicide                    | 0                                                                                                                                                                                                | 0                                                                                                                                                               | N/A            |
| Cause of death             | Pulmonary embolism, lymphoma, cardiac failure, lung cancer, acute myocardial infarction, cardiopulmonary arrest, cerebrovascular accident, colon cancer, leukemia, renal failure, cardiac arrest | Cardiopulmonary arrest, pneumonia, cerebrovascular accident, cardiac failure, cardiac arrest, leukemia, heart disease, multiple vehicle accident, liver failure |                |

Values denote mean ± standard deviation. MDD: Major Depressive Disorder, N/A: not applicable.

**Table S2. Primer sequences for qPCR-based mRNA expression analysis**

| Primers  |         | Sequences             |
|----------|---------|-----------------------|
| RASD1    | Forward | TCTGCCCTCCCAAACTAAGC  |
|          | Reverse | TCCATGTTGACACCGGAAC   |
| H1FX     | Forward | CGGGTCCTCTCAGTCTTTCC  |
|          | Reverse | CAAGGCCGAGAGCCAATAGA  |
| SYN1     | Forward | CCCTACTGTTGAGCCCCTTC  |
|          | Reverse | ATCCTTGTGGGGCTAGGTGT  |
| IGFBP4   | Forward | GACCCACTCCCAAAGCTCAG  |
|          | Reverse | CAACCAAGCAGATGGTGCAA  |
| SYN2     | Forward | AGCTGACGGTGGTATTGCTT  |
|          | Reverse | GACTGACACCACCCTGTAGC  |
| HPSD1    | Forward | TGCTGTCATTGTCCATGCCTA |
|          | Reverse | ACATGGCTCTTGTACCCAGT  |
| RBBP4    | Forward | TGGCACATCAATCCGCACT   |
|          | Reverse | GCATGGCTGGGCACTAAAAA  |
| ZFN32    | Forward | GAGACACCCTATCTGTGCGG  |
|          | Reverse | AAGTGGTCAAAGGGTGAGCC  |
| TLR2     | Forward | ACTACGTGGATGTACCGTCA  |
|          | Reverse | AAACAGCACCCAGACAAAA   |
| ZFP36    | Forward | TGCCAAACCCACCCATAAA   |
|          | Reverse | TACAAGGGAAGCAGACGACC  |
| IRF1     | Forward | CACCAGGGCTGTCAGTTGAT  |
|          | Reverse | TGGAGCAGCATCTGTGTGTT  |
| ELK1     | Forward | TGGAGTTGGGAGGGAGGAAT  |
|          | Reverse | AAATCACCAACCCCAAGGTC  |
| HES5     | Forward | AGAGTCCCTGCCGTTTTAGG  |
|          | Reverse | GCCCCGGCACTACAAATATC  |
| ASPDH    | Forward | GGCTTCGATGGGGTGATTGG  |
|          | Reverse | CCGCTCAGCTCTACATCCAC  |
| CYB561D1 | Forward | ATGCTCCTGTGTCTGGTTGG  |
|          | Reverse | ACACCAGTGATAGGGACGGA  |
| FUT9     | Forward | GCATCCTGGGAGCAAAGCAT  |
|          | Reverse | TGGTTGGTAAAGTCGGCGTC  |

|          |         |                           |
|----------|---------|---------------------------|
| GAPDH    | Forward | CCACATCGCTGAGACACCAT      |
|          | Reverse | AGTTAAAAGCAGCCCTGGTGA     |
| ACTB     | Forward | AGTCATTCCAAATATGAGATGCGTT |
|          | Reverse | TGCTATCACCTCCCCTGTGT      |
| 18s rRNA | Forward | CGGCGACGACCCATTCGAAC      |
|          | Reverse | GAATCGAACCTGATTCCCCGTC    |

**Table S3. All significantly up- and down-regulated genes in the total fraction**

| Gene symbol               | Ensemble ID          | Locus                     | Fold change | p-Value     | q-Value     |
|---------------------------|----------------------|---------------------------|-------------|-------------|-------------|
| <b>Up-regulated genes</b> |                      |                           |             |             |             |
| TMEM189-UBE2V1            | ENSG00000124208.16_3 | chr20:48697661-48770174   | 2.093301568 | 0.028970933 | 0.998154148 |
| HNRNPUL2-BSCL2            | ENSG00000234857.2_3  | chr11:62457747-62494856   | 1.862368887 | 0.029806405 | 0.998154148 |
| SPI1                      | ENSG00000066336.11_2 | chr11:47376411-47400127   | 1.674116789 | 0.016973309 | 0.998154148 |
| RASD1                     | ENSG00000108551.4_2  | chr17:17397751-17399709   | 1.671422929 | 0.008487038 | 0.998154148 |
| HIST1H1D                  | ENSG00000124575.6_2  | chr6:26234496-26235161    | 1.6182264   | 0.021265941 | 0.998154148 |
| HSPA2                     | ENSG00000126803.9_3  | chr14:65002623-65012891   | 1.587199534 | 0.03068192  | 0.998154148 |
| OLFML3                    | ENSG00000116774.11_2 | chr1:114522013-114578194  | 1.566558294 | 0.015948973 | 0.998154148 |
| HIFX                      | ENSG00000184897.5_2  | chr3:129033614-129035120  | 1.557723521 | 0.007713264 | 0.998154148 |
| TMEM119                   | ENSG00000183160.8_4  | chr12:108983622-108992096 | 1.533970067 | 0.027726499 | 0.998154148 |
| SYN2                      | ENSG00000157152.16_3 | chr3:12045876-12232900    | 1.529728606 | 0.025668161 | 0.998154148 |
| SLC2A5                    | ENSG00000142583.17_3 | chr1:9095166-9148537      | 1.524777663 | 0.0259714   | 0.998154148 |
| MGP                       | ENSG00000111341.9_2  | chr12:15034115-15038860   | 1.520322977 | 0.026291557 | 0.998154148 |
| CD248                     | ENSG00000174807.3_2  | chr11:66081958-66084515   | 1.517306136 | 0.012513065 | 0.998154148 |
| SYN1                      | ENSG00000008056.13_3 | chrX:47431297-47479342    | 1.514899142 | 0.010820886 | 0.998154148 |
| ADAMTS2                   | ENSG00000087116.14_3 | chr5:178537852-178772431  | 1.504012857 | 0.023024431 | 0.998154148 |
| SELENON                   | ENSG00000162430.16_3 | chr1:26126667-26144715    | 1.502459486 | 0.018145924 | 0.998154148 |
| EHD1                      | ENSG00000110047.17_2 | chr11:64619114-64655768   | 1.499851368 | 0.00026562  | 0.998154148 |
| ELK1                      | ENSG00000126767.17_2 | chrX:47494920-47510003    | 1.485837489 | 0.005823038 | 0.998154148 |
| OLFML2B                   | ENSG00000162745.10_2 | chr1:161952982-161993644  | 1.484633409 | 0.038133823 | 0.998154148 |
| IGFBP4                    | ENSG00000141753.6_2  | chr17:38599713-38613983   | 1.484402089 | 0.020842833 | 0.998154148 |
| ABI3                      | ENSG00000108798.8_3  | chr17:47287589-47300587   | 1.479444697 | 0.020125555 | 0.998154148 |
| RCN3                      | ENSG00000142552.7_2  | chr19:50030875-50050219   | 1.468428048 | 0.017645622 | 0.998154148 |
| C1QL1                     | ENSG00000131094.3_2  | chr17:43037061-43045439   | 1.462663912 | 0.001072586 | 0.998154148 |
| CXCL16                    | ENSG00000161921.14_3 | chr17:4636821-4643217     | 1.459074103 | 0.036379211 | 0.998154148 |
| LY6H                      | ENSG00000176956.12_2 | chr8:144239331-144242128  | 1.451994387 | 0.038359705 | 0.998154148 |
| ZNF580                    | ENSG00000213015.8_3  | chr19:56146382-56154835   | 1.451031456 | 0.018192279 | 0.998154148 |
| WAS                       | ENSG00000015285.10_2 | chrX:48534985-48549818    | 1.441728224 | 0.02891499  | 0.998154148 |
| CITED4                    | ENSG00000179862.6_2  | chr1:41326723-41328038    | 1.441314287 | 0.017935839 | 0.998154148 |
| ANKRD63                   | ENSG00000230778.1_3  | chr15:40573645-40574787   | 1.440832847 | 0.003236504 | 0.998154148 |
| CPVL                      | ENSG00000106066.14_3 | chr7:29034847-29235067    | 1.42116355  | 0.006864688 | 0.998154148 |

|         |                      |                           |             |             |             |
|---------|----------------------|---------------------------|-------------|-------------|-------------|
| MACROD1 | ENSG00000133315.10_3 | chr11:63766030-63933578   | 1.416687846 | 0.004172901 | 0.998154148 |
| TGFB1   | ENSG00000105329.9_2  | chr19:41807492-41859816   | 1.407438515 | 0.048264988 | 0.998154148 |
| UTS2R   | ENSG00000181408.3_2  | chr17:80332106-80333462   | 1.396622228 | 0.003928235 | 0.998154148 |
| TMEM250 | ENSG00000238227.7_4  | chr9:139006427-139010709  | 1.391864223 | 0.013786587 | 0.998154148 |
| GPR150  | ENSG00000178015.4_2  | chr5:94955782-94957846    | 1.388163585 | 0.015277308 | 0.998154148 |
| CHTF8   | ENSG00000168802.12_3 | chr16:69151913-69166487   | 1.387747039 | 0.039828071 | 0.998154148 |
| APBB1IP | ENSG00000077420.15_2 | chr10:26727132-26856732   | 1.384906718 | 0.043917747 | 0.998154148 |
| BBC3    | ENSG00000105327.17_3 | chr19:47724079-47736023   | 1.384812475 | 0.006357654 | 0.998154148 |
| ELN     | ENSG00000049540.16_3 | chr7:73442119-73484237    | 1.384729315 | 0.021770765 | 0.998154148 |
| RPRM    | ENSG00000177519.3_3  | chr2:154333852-154335322  | 1.375723414 | 0.036936666 | 0.998154148 |
| RAMP2   | ENSG00000131477.10_2 | chr17:40910465-40915059   | 1.374749528 | 0.047896512 | 0.998154148 |
| PRRT1   | ENSG00000204314.10_2 | chr6:32116136-32122150    | 1.364997463 | 0.02346281  | 0.998154148 |
| MAFB    | ENSG00000204103.3_2  | chr20:39314488-39317880   | 1.363526305 | 0.046257386 | 0.998154148 |
| RTP5    | ENSG00000188011.5_2  | chr2:242811752-242815975  | 1.358591765 | 0.025310842 | 0.998154148 |
| FAM219A | ENSG00000164970.14_2 | chr9:34398182-34458568    | 1.35646382  | 0.03572463  | 0.998154148 |
| PIK3IP1 | ENSG00000100100.12_3 | chr22:31677579-31688520   | 1.354405462 | 0.049762571 | 0.998154148 |
| LIN37   | ENSG00000267796.7_3  | chr19:36239262-36245420   | 1.349361952 | 0.001828053 | 0.998154148 |
| LYL1    | ENSG00000104903.4_2  | chr19:13209847-13213975   | 1.344030589 | 0.011272836 | 0.998154148 |
| LTBP2   | ENSG00000119681.11_3 | chr14:74964873-75079081   | 1.342039282 | 0.035090986 | 0.998154148 |
| CD37    | ENSG00000104894.11_2 | chr19:49838428-49846592   | 1.338776193 | 0.029333429 | 0.998154148 |
| CSF3R   | ENSG00000119535.17_3 | chr1:36931644-36948879    | 1.33853256  | 0.018379734 | 0.998154148 |
| WIPF3   | ENSG00000122574.10_2 | chr7:29846102-29956682    | 1.33549892  | 0.007525526 | 0.998154148 |
| ATF5    | ENSG00000169136.10_3 | chr19:50431959-50437192   | 1.33248749  | 0.025364887 | 0.998154148 |
| PRR36   | ENSG00000183248.11_2 | chr19:7933605-7939264     | 1.32961583  | 0.045489483 | 0.998154148 |
| FAM212A | ENSG00000185614.4_2  | chr3:49840687-49842463    | 1.329368537 | 0.035084598 | 0.998154148 |
| SYK     | ENSG00000165025.14_2 | chr9:93564069-93660831    | 1.328146351 | 0.03231606  | 0.998154148 |
| HK3     | ENSG00000160883.10_2 | chr5:176307870-176326333  | 1.32356396  | 0.013421451 | 0.998154148 |
| KCNQ1   | ENSG00000053918.15_3 | chr11:2465914-2870339     | 1.321441032 | 0.01270184  | 0.998154148 |
| NFAM1   | ENSG00000235568.6_2  | chr22:42776416-42828401   | 1.320979112 | 0.02182532  | 0.998154148 |
| PLPPR2  | ENSG00000105520.10_2 | chr19:11466062-11476374   | 1.319630942 | 0.032818037 | 0.998154148 |
| GYPC    | ENSG00000136732.14_3 | chr2:127413509-127454251  | 1.31916622  | 0.024361129 | 0.998154148 |
| GMIP    | ENSG00000089639.10_2 | chr19:19740285-19754476   | 1.315489247 | 0.026706664 | 0.998154148 |
| IL10RA  | ENSG00000110324.10_3 | chr11:117857063-117873752 | 1.311978622 | 0.017003244 | 0.998154148 |
| DBN1    | ENSG00000113758.13_4 | chr5:176883609-176901402  | 1.309833374 | 0.017928644 | 0.998154148 |
| CHGA    | ENSG00000100604.12_4 | chr14:93389425-93401638   | 1.309101639 | 0.023071499 | 0.998154148 |

|            |                      |                          |             |             |             |
|------------|----------------------|--------------------------|-------------|-------------|-------------|
| MOGS       | ENSG00000115275.11_3 | chr2:74688184-74692537   | 1.308928336 | 0.00086767  | 0.998154148 |
| TRNP1      | ENSG00000253368.3_3  | chr1:27320198-27327389   | 1.308170907 | 0.006174039 | 0.998154148 |
| ADGRE5     | ENSG00000123146.19_3 | chr19:14491313-14519537  | 1.307845624 | 0.032162814 | 0.998154148 |
| ARHGAP4    | ENSG00000089820.15_3 | chrX:153172821-153200452 | 1.306522635 | 0.008621848 | 0.998154148 |
| SLC9A1     | ENSG00000090020.10_2 | chr1:27425306-27493472   | 1.304350275 | 0.034164689 | 0.998154148 |
| UCP2       | ENSG00000175567.8_3  | chr11:73685712-73694352  | 1.303259123 | 0.037705574 | 0.998154148 |
| HLA-DMB    | ENSG00000242574.8_3  | chr6:32902406-32908847   | 1.295387797 | 0.040308265 | 0.998154148 |
| PPP1R18    | ENSG00000146112.11_2 | chr6:30644166-30655672   | 1.294455305 | 0.019709809 | 0.998154148 |
| OSCAR      | ENSG00000170909.13_2 | chr19:54597933-54606000  | 1.294417495 | 0.01439321  | 0.998154148 |
| FBXL18     | ENSG00000155034.18_3 | chr7:5470966-5553429     | 1.294226449 | 0.043758874 | 0.998154148 |
| PNRC1      | ENSG00000146278.10_2 | chr6:89790470-89794879   | 1.293081969 | 0.016021982 | 0.998154148 |
| TOX2       | ENSG00000124191.17_2 | chr20:42543504-42698256  | 1.292475229 | 0.034361075 | 0.998154148 |
| TMEM184B   | ENSG00000198792.12_3 | chr22:38615298-38669040  | 1.290343169 | 0.049882827 | 0.998154148 |
| TICAM1     | ENSG00000127666.9_2  | chr19:4815944-4831716    | 1.28926153  | 0.009868033 | 0.998154148 |
| PCDHGA12   | ENSG00000253159.2_3  | chr5:140810156-140892546 | 1.288172369 | 0.041662243 | 0.998154148 |
| ZNF687     | ENSG00000143373.17_2 | chr1:151254094-151264656 | 1.287295596 | 0.003434986 | 0.998154148 |
| UNC93B1    | ENSG00000110057.7_3  | chr11:67758575-67772452  | 1.286261619 | 0.036635069 | 0.998154148 |
| CMTM3      | ENSG00000140931.19_3 | chr16:66637777-66647795  | 1.285256771 | 0.038392308 | 0.998154148 |
| CD34       | ENSG00000174059.16_4 | chr1:208054317-208084747 | 1.284705424 | 0.042190788 | 0.998154148 |
| AC098850.4 | ENSG00000266302.6_4  | chr17:16593575-16707767  | 1.283861168 | 0.038597569 | 0.998154148 |
| PRAM1      | ENSG00000133246.11_2 | chr19:8554940-8567996    | 1.282315029 | 0.015367944 | 0.998154148 |
| SLC26A11   | ENSG00000181045.14_3 | chr17:78193498-78227299  | 1.279903414 | 0.034304306 | 0.998154148 |
| RIN1       | ENSG00000174791.10_2 | chr11:66097713-66104311  | 1.275899205 | 0.005839098 | 0.998154148 |
| KDELR1     | ENSG00000105438.8_2  | chr19:48885827-48894810  | 1.274793024 | 0.028182492 | 0.998154148 |
| CEBPA      | ENSG00000245848.2_2  | chr19:33790840-33793470  | 1.273480242 | 0.045344695 | 0.998154148 |
| CORO7      | ENSG00000262246.5_4  | chr16:4404543-4475706    | 1.272891144 | 0.035288201 | 0.998154148 |
| TMEM175    | ENSG00000127419.16_3 | chr4:926175-952444       | 1.272863271 | 0.01349447  | 0.998154148 |
| MED25      | ENSG00000104973.16_3 | chr19:50321536-50342073  | 1.270681745 | 0.016535929 | 0.998154148 |
| TEF        | ENSG00000167074.14_2 | chr22:41763337-41795330  | 1.269899857 | 0.029924034 | 0.998154148 |
| FYB1       | ENSG00000082074.15_4 | chr5:39105338-39274630   | 1.269899446 | 0.025860073 | 0.998154148 |
| TMUB1      | ENSG00000164897.12_2 | chr7:150778167-150780633 | 1.267646457 | 0.017216651 | 0.998154148 |
| FLOT1      | ENSG00000137312.14_2 | chr6:30695486-30710510   | 1.266533143 | 0.025381547 | 0.998154148 |
| WDR81      | ENSG00000167716.18_3 | chr17:1619817-1641893    | 1.265851309 | 0.010695608 | 0.998154148 |
| FAM234A    | ENSG00000167930.15_3 | chr16:284545-318970      | 1.264069786 | 0.04141908  | 0.998154148 |
| ARHGEF25   | ENSG00000240771.6_2  | chr12:58003963-58013162  | 1.262795045 | 0.027200013 | 0.998154148 |

|           |                      |                          |             |             |             |
|-----------|----------------------|--------------------------|-------------|-------------|-------------|
| CENPVL3   | ENSG00000224109.2_3  | chrX:51360907-51361770   | 1.262008089 | 0.003213071 | 0.998154148 |
| ECHDC3    | ENSG00000134463.14_3 | chr10:11784365-11806069  | 1.261969349 | 0.013525789 | 0.998154148 |
| GRAMD1A   | ENSG00000089351.14_3 | chr19:35485688-35517375  | 1.261513464 | 0.024511043 | 0.998154148 |
| SNX12     | ENSG00000147164.11_3 | chrX:70276182-70293276   | 1.25945196  | 0.039287017 | 0.998154148 |
| YPEL3     | ENSG00000090238.11_3 | chr16:30103635-30108236  | 1.258496379 | 0.029936041 | 0.998154148 |
| SF3A2     | ENSG00000104897.9_4  | chr19:2236503-2248678    | 1.258299145 | 0.028933528 | 0.998154148 |
| CHMP1A    | ENSG00000131165.14_2 | chr16:89710839-89724253  | 1.257199374 | 0.04261408  | 0.998154148 |
| MS4A6A    | ENSG00000110077.14_4 | chr11:59939487-59952139  | 1.256880221 | 0.039990751 | 0.998154148 |
| ZDHHC22   | ENSG00000177108.5_3  | chr14:77597613-77609077  | 1.256360962 | 0.029680791 | 0.998154148 |
| VPREB3    | ENSG00000128218.7_2  | chr22:24094930-24096655  | 1.25634214  | 0.039219667 | 0.998154148 |
| EPN3      | ENSG00000049283.17_3 | chr17:48609904-48621111  | 1.256337547 | 0.016817627 | 0.998154148 |
| Z98749.3  | ENSG00000283900.1_2  | chr22:38687924-38794527  | 1.255492154 | 0.011959624 | 0.998154148 |
| CARMIL2   | ENSG00000159753.13_3 | chr16:67678822-67691472  | 1.254393365 | 0.048002407 | 0.998154148 |
| TNFRSF10C | ENSG00000173535.13_2 | chr8:22941868-22974950   | 1.253632774 | 0.00711036  | 0.998154148 |
| ZNF503    | ENSG00000165655.16_3 | chr10:77157588-77161664  | 1.252966607 | 0.005541633 | 0.998154148 |
| FRAT1     | ENSG00000165879.8_2  | chr10:99079024-99081672  | 1.25216659  | 0.000854185 | 0.998154148 |
| CPNE5     | ENSG00000124772.11_2 | chr6:36708552-36807778   | 1.251748722 | 0.03135507  | 0.998154148 |
| IRF2BPL   | ENSG00000119669.4_2  | chr14:77490886-77495042  | 1.250817775 | 0.014276884 | 0.998154148 |
| TBXA2R    | ENSG00000006638.11_2 | chr19:3594504-3606838    | 1.249929615 | 0.005014844 | 0.998154148 |
| MAPK8IP2  | ENSG00000008735.13_2 | chr22:51039114-51052409  | 1.249348402 | 0.035938689 | 0.998154148 |
| PLPP1     | ENSG00000067113.16_3 | chr5:54720682-54830878   | 1.248928976 | 0.030956819 | 0.998154148 |
| TBC1D10B  | ENSG00000169221.13_2 | chr16:30368423-30381585  | 1.24884791  | 0.047418348 | 0.998154148 |
| IQSEC2    | ENSG00000124313.13_3 | chrX:53255010-53350526   | 1.246952196 | 0.040924259 | 0.998154148 |
| PILRA     | ENSG00000085514.15_4 | chr7:99965153-99997722   | 1.245500464 | 0.045633292 | 0.998154148 |
| IRF3      | ENSG00000126456.15_3 | chr19:50162826-50169132  | 1.244512894 | 0.016169615 | 0.998154148 |
| H1FO      | ENSG00000189060.5_2  | chr22:38201100-38203443  | 1.242274521 | 0.019109489 | 0.998154148 |
| ZGPAT     | ENSG00000197114.11_3 | chr20:62338817-62367494  | 1.242126229 | 0.047414749 | 0.998154148 |
| MAP2K2    | ENSG00000126934.13_2 | chr19:4090319-4124126    | 1.241750844 | 0.026266732 | 0.998154148 |
| ZC3H3     | ENSG00000014164.6_2  | chr8:144519825-144623623 | 1.241674282 | 0.032984036 | 0.998154148 |
| HSD11B2   | ENSG00000176387.6_2  | chr16:67464555-67471456  | 1.240862038 | 0.02640214  | 0.998154148 |
| MAP7D1    | ENSG00000116871.15_4 | chr1:36621180-36646450   | 1.240647838 | 0.046467479 | 0.998154148 |
| DMRTC1B   | ENSG00000184911.14_4 | chrX:71996833-72068636   | 1.239681166 | 0.014131602 | 0.998154148 |
| DCAF15    | ENSG00000132017.10_3 | chr19:14063304-14072261  | 1.239627615 | 0.027237674 | 0.998154148 |
| NEURL2    | ENSG00000124257.6_2  | chr20:44517264-44519926  | 1.237648385 | 0.045806968 | 0.998154148 |
| MEF2D     | ENSG00000116604.17_3 | chr1:156433519-156470620 | 1.236800814 | 0.022173543 | 0.998154148 |



|         |                      |                           |             |             |             |
|---------|----------------------|---------------------------|-------------|-------------|-------------|
| ATN1    | ENSG00000111676.14_2 | chr12:7033626-7051484     | 1.236547688 | 0.049947864 | 0.998154148 |
| FAM46B  | ENSG00000158246.7_2  | chr1:27331511-27339327    | 1.236543611 | 0.038720862 | 0.998154148 |
| ZNF414  | ENSG00000133250.13_2 | chr19:8574562-8579048     | 1.236031808 | 0.038160921 | 0.998154148 |
| EPN1    | ENSG00000063245.14_3 | chr19:56186592-56221224   | 1.235537574 | 0.029422358 | 0.998154148 |
| RNF26   | ENSG00000173456.4_2  | chr11:119205237-119208023 | 1.233283602 | 0.034126728 | 0.998154148 |
| DMRTC1  | ENSG00000269502.5_3  | chrX:72091859-72163643    | 1.232011759 | 0.027055565 | 0.998154148 |
| HPCAL1  | ENSG00000115756.12_3 | chr2:10443015-10567743    | 1.231646799 | 0.046724564 | 0.998154148 |
| PARVG   | ENSG00000138964.16_3 | chr22:44568836-44615413   | 1.231528349 | 0.032680199 | 0.998154148 |
| TIMM29  | ENSG00000142444.6_2  | chr19:11039409-11044211   | 1.231360932 | 0.032175143 | 0.998154148 |
| CHST1   | ENSG00000175264.7_2  | chr11:45670427-45687172   | 1.230542227 | 0.008799872 | 0.998154148 |
| LILRB4  | ENSG00000186818.12_3 | chr19:55155340-55181810   | 1.22892909  | 0.041270466 | 0.998154148 |
| FAM189B | ENSG00000160767.20_3 | chr1:155216996-155225274  | 1.227694877 | 0.04889218  | 0.998154148 |
| FAM214B | ENSG00000005238.19_2 | chr9:35104109-35116338    | 1.226832726 | 0.016761706 | 0.998154148 |
| LOXL1   | ENSG00000129038.15_2 | chr15:74218330-74244478   | 1.226007718 | 0.012127077 | 0.998154148 |
| PLCB2   | ENSG00000137841.11_3 | chr15:40570377-40600136   | 1.224290889 | 0.040442992 | 0.998154148 |
| CBX4    | ENSG00000141582.14_3 | chr17:77806955-77813228   | 1.219360485 | 0.018393571 | 0.998154148 |
| REEP4   | ENSG00000168476.11_3 | chr8:21995533-21999464    | 1.219224627 | 0.048826155 | 0.998154148 |
| TMEM219 | ENSG00000149932.16_2 | chr16:29952206-29984373   | 1.218901567 | 0.045031882 | 0.998154148 |
| NUCB1   | ENSG00000104805.15_4 | chr19:49403307-49426629   | 1.218433803 | 0.043787086 | 0.998154148 |
| SCAF1   | ENSG00000126461.14_4 | chr19:50145382-50161899   | 1.213257723 | 0.01796601  | 0.998154148 |
| CCDC92  | ENSG00000119242.8_3  | chr12:124403207-124457378 | 1.212157757 | 0.034289623 | 0.998154148 |
| RAB8A   | ENSG00000167461.11_3 | chr19:16222439-16245044   | 1.210984893 | 0.04918032  | 0.998154148 |
| CCDC120 | ENSG00000147144.12_3 | chrX:48911101-48927509    | 1.2108742   | 0.023224527 | 0.998154148 |
| IFFO1   | ENSG00000010295.19_3 | chr12:6647541-6665249     | 1.210380167 | 0.026730574 | 0.998154148 |
| CC2D1A  | ENSG00000132024.17_3 | chr19:14017014-14041692   | 1.210156098 | 0.034319422 | 0.998154148 |
| PRR19   | ENSG00000188368.9_4  | chr19:42806250-42814973   | 1.208071838 | 0.011187886 | 0.998154148 |
| ATXN2L  | ENSG00000168488.18_3 | chr16:28834356-28848558   | 1.205998217 | 0.00826407  | 0.998154148 |
| MARCH9  | ENSG00000139266.5_2  | chr12:58148881-58154190   | 1.205933707 | 0.048561097 | 0.998154148 |
| FHL3    | ENSG00000183386.9_2  | chr1:38462442-38471278    | 1.205539088 | 0.049611821 | 0.998154148 |
| IL27RA  | ENSG00000104998.3_2  | chr19:14142560-14164028   | 1.205413768 | 0.038545702 | 0.998154148 |
| ZNF777  | ENSG00000196453.7_2  | chr7:149128454-149158214  | 1.205124237 | 0.035023567 | 0.998154148 |
| BAG1    | ENSG00000107262.19_4 | chr9:33247818-33264718    | 1.20502387  | 0.03454745  | 0.998154148 |
| PALM3   | ENSG00000187867.8_2  | chr19:14164177-14169971   | 1.203993191 | 0.016492135 | 0.998154148 |
| EFEMP2  | ENSG00000172638.12_3 | chr11:65633912-65641063   | 1.203885941 | 0.0409432   | 0.998154148 |
| KDF1    | ENSG00000175707.8_2  | chr1:27276053-27286897    | 1.2031965   | 0.028941187 | 0.998154148 |

|            |                      |                           |             |             |             |
|------------|----------------------|---------------------------|-------------|-------------|-------------|
| FAIM2      | ENSG00000135472.8_2  | chr12:50260679-50298000   | 1.201533467 | 0.046380128 | 0.998154148 |
| AC011897.1 | ENSG00000265629.1    | chr2:14775215-14790933    | 1.200024946 | 0.047682398 | 0.998154148 |
| MISP3      | ENSG00000141854.9_3  | chr19:14183348-14185874   | 1.197526506 | 0.035501877 | 0.998154148 |
| STIM1      | ENSG00000167323.11_3 | chr11:3875757-4114440     | 1.19676625  | 0.04960973  | 0.998154148 |
| AQP9       | ENSG00000103569.9_3  | chr15:58430368-58478110   | 1.196477072 | 0.044175948 | 0.998154148 |
| FCHSD1     | ENSG00000197948.10_2 | chr5:141018869-141030986  | 1.195007475 | 0.026266905 | 0.998154148 |
| DENND1C    | ENSG00000205744.9_3  | chr19:6467218-6482568     | 1.193688939 | 0.028619529 | 0.998154148 |
| DPH2       | ENSG00000132768.13_2 | chr1:44435672-44439041    | 1.192547301 | 0.028123128 | 0.998154148 |
| GOLGA7B    | ENSG00000155265.10_2 | chr10:99609996-99631337   | 1.190980819 | 0.049999209 | 0.998154148 |
| AKAP8      | ENSG00000105127.8_2  | chr19:15464196-15490609   | 1.189835679 | 0.013836201 | 0.998154148 |
| AL049844.1 | ENSG00000257065.1_4  | chr6:144128229-144165754  | 1.189584861 | 0.031421592 | 0.998154148 |
| ZSWIM8     | ENSG00000214655.10_3 | chr10:75545340-75561555   | 1.188953944 | 0.045516401 | 0.998154148 |
| MINK1      | ENSG00000141503.15_3 | chr17:4736683-4801356     | 1.187427802 | 0.042404185 | 0.998154148 |
| KIAA1211   | ENSG00000109265.13_4 | chr4:56915239-57194791    | 1.180047447 | 0.039572492 | 0.998154148 |
| CNOT3      | ENSG00000088038.17_3 | chr19:54641444-54659419   | 1.179581851 | 0.022284019 | 0.998154148 |
| KCNK13     | ENSG00000152315.4_3  | chr14:90528109-90652201   | 1.179488039 | 0.046428605 | 0.998154148 |
| FIGNL2     | ENSG00000261308.2_2  | chr12:52211624-52242550   | 1.178955985 | 0.00427692  | 0.998154148 |
| SYVN1      | ENSG00000162298.18_3 | chr11:64889252-64902004   | 1.178337248 | 0.047129168 | 0.998154148 |
| USP2       | ENSG00000036672.15_3 | chr11:119225925-119252436 | 1.17750312  | 0.035917434 | 0.998154148 |
| CHERP      | ENSG00000085872.14_3 | chr19:16628700-16653341   | 1.174176363 | 0.020499741 | 0.998154148 |
| MKL1       | ENSG00000196588.14_3 | chr22:40806285-41032706   | 1.172087662 | 0.040356872 | 0.998154148 |
| FRAT2      | ENSG00000181274.6_2  | chr10:99092254-99094466   | 1.170560935 | 0.039615989 | 0.998154148 |
| MAPK8IP1   | ENSG00000121653.11_2 | chr11:45907202-45928016   | 1.170325522 | 0.031905401 | 0.998154148 |
| PHF13      | ENSG00000116273.5_2  | chr1:6673745-6684093      | 1.17024421  | 0.009403881 | 0.998154148 |
| CDIPT      | ENSG00000103502.13_2 | chr16:29869678-29875057   | 1.169565208 | 0.022727541 | 0.998154148 |
| RSPO4      | ENSG00000101282.8_2  | chr20:939095-982907       | 1.165890678 | 0.012402888 | 0.998154148 |
| VSTM2B     | ENSG00000187135.7_2  | chr19:30017406-30055386   | 1.164958043 | 0.043166071 | 0.998154148 |
| ALDH3B1    | ENSG00000006534.15_2 | chr11:67776048-67796749   | 1.164038261 | 0.049171069 | 0.998154148 |
| GCK        | ENSG00000106633.15_2 | chr7:44183870-44237769    | 1.16275176  | 0.038666542 | 0.998154148 |
| ADPRHL1    | ENSG00000153531.13_3 | chr13:114053925-114107839 | 1.16130856  | 0.045462974 | 0.998154148 |
| ZMYND15    | ENSG00000141497.13_2 | chr17:4643310-4649414     | 1.156489742 | 0.036519367 | 0.998154148 |
| CALHM2     | ENSG00000138172.10_2 | chr10:105206543-105212159 | 1.156295872 | 0.037591175 | 0.998154148 |
| TINCR      | ENSG00000223573.6_3  | chr19:5558178-5568045     | 1.154064039 | 0.037996827 | 0.998154148 |
| HTR1D      | ENSG00000179546.4_3  | chr1:23518388-23521222    | 1.152832868 | 0.007321327 | 0.998154148 |
| UNK        | ENSG00000132478.9_3  | chr17:73780852-73821880   | 1.145287907 | 0.048767977 | 0.998154148 |

|                             |                      |                           |             |             |             |
|-----------------------------|----------------------|---------------------------|-------------|-------------|-------------|
| C19orf57                    | ENSG00000132016.11_2 | chr19:13993161-14017265   | 1.141675582 | 0.01483579  | 0.998154148 |
| ZDHHC7                      | ENSG00000153786.12_3 | chr16:85007787-85045141   | 1.138777196 | 0.042348993 | 0.998154148 |
| PSD4                        | ENSG00000125637.15_3 | chr2:113914902-113966973  | 1.136417941 | 0.032569402 | 0.998154148 |
| ARHGAP27                    | ENSG00000159314.11_3 | chr17:43471268-43511787   | 1.13016636  | 0.047166984 | 0.998154148 |
| AC245033.1                  | ENSG00000260836.1_4  | chr15:83208783-83224682   | 1.117217036 | 0.035776861 | 0.998154148 |
| SPPL3                       | ENSG00000157837.15_3 | chr12:121200313-121342174 | 1.116406511 | 0.025117764 | 0.998154148 |
| CIZ1                        | ENSG00000148337.20_3 | chr9:130928343-130966662  | 1.107052403 | 0.012425977 | 0.998154148 |
| <b>Down-regulated genes</b> |                      |                           |             |             |             |
| ITGAE                       | ENSG00000083457.11_2 | chr17:3617922-3704537     | 0.937559176 | 0.039233262 | 0.998154148 |
| MTO1                        | ENSG00000135297.15_2 | chr6:74171301-74218959    | 0.910465468 | 0.034373979 | 0.998154148 |
| PRDM5                       | ENSG00000138738.10_3 | chr4:121606074-121844025  | 0.90842461  | 0.019908993 | 0.998154148 |
| CMC2                        | ENSG00000103121.8_3  | chr16:81000345-81053875   | 0.904900431 | 0.010098337 | 0.998154148 |
| AFG1L                       | ENSG00000135537.16_4 | chr6:108616098-108847999  | 0.901369232 | 0.03136285  | 0.998154148 |
| CEP83                       | ENSG00000173588.14_3 | chr12:94700225-94853764   | 0.901204785 | 0.041106844 | 0.998154148 |
| TECTA                       | ENSG00000109927.9_3  | chr11:120971882-121062202 | 0.90053653  | 0.044549134 | 0.998154148 |
| C1orf131                    | ENSG00000143633.12_3 | chr1:231359509-231376933  | 0.899590718 | 0.024883933 | 0.998154148 |
| HAUS1                       | ENSG00000152240.12_2 | chr18:43684298-43708299   | 0.897269659 | 0.032566167 | 0.998154148 |
| PIN4                        | ENSG00000102309.12_3 | chrX:71401203-71522776    | 0.897010706 | 0.041540967 | 0.998154148 |
| AP3S2                       | ENSG00000157823.16_3 | chr15:90373831-90437870   | 0.893331601 | 0.035023666 | 0.998154148 |
| TMEM116                     | ENSG00000198270.12_4 | chr12:112369086-112450989 | 0.89259114  | 0.034579064 | 0.998154148 |
| EFCAB6                      | ENSG00000186976.14_3 | chr22:43924624-44208217   | 0.891949763 | 0.048979378 | 0.998154148 |
| COG2                        | ENSG00000135775.13_2 | chr1:230778235-230829728  | 0.891376761 | 0.049634007 | 0.998154148 |
| APLF                        | ENSG00000169621.9_4  | chr2:68694693-68882994    | 0.888731908 | 0.03550356  | 0.998154148 |
| PROM1                       | ENSG00000007062.11_3 | chr4:15964699-16086001    | 0.887604983 | 0.045747121 | 0.998154148 |
| PCDHA8                      | ENSG00000204962.5_3  | chr5:140220772-140391929  | 0.886855433 | 0.049626064 | 0.998154148 |
| GTF2E1                      | ENSG00000153767.9_3  | chr3:120461484-120501916  | 0.883307979 | 0.043196557 | 0.998154148 |
| ZNF101                      | ENSG00000181896.11_3 | chr19:19779605-19794318   | 0.883139347 | 0.02450328  | 0.998154148 |
| PTRH2                       | ENSG00000141378.14_2 | chr17:57751997-57784987   | 0.882647994 | 0.025902767 | 0.998154148 |
| CBFA2T2                     | ENSG00000078699.21_2 | chr20:32077881-32237842   | 0.881911109 | 0.044382759 | 0.998154148 |
| KIAA0907                    | ENSG00000132680.10_3 | chr1:155882834-155904191  | 0.881518112 | 0.043701589 | 0.998154148 |
| HYKK                        | ENSG00000188266.13_2 | chr15:78799906-78829714   | 0.880072407 | 0.02921606  | 0.998154148 |
| ZNF229                      | ENSG00000278318.4_3  | chr19:44921685-44952766   | 0.879799197 | 0.020186005 | 0.998154148 |
| B3GALNT2                    | ENSG00000162885.12_2 | chr1:235613238-235667781  | 0.879109274 | 0.032853327 | 0.998154148 |
| NBPF3                       | ENSG00000142794.18_3 | chr1:21766621-21811498    | 0.87876567  | 0.039145107 | 0.998154148 |
| C2orf42                     | ENSG00000115998.7_3  | chr2:70377012-70475747    | 0.878397634 | 0.045605554 | 0.998154148 |

|         |                      |                           |             |             |             |
|---------|----------------------|---------------------------|-------------|-------------|-------------|
| COQ5    | ENSG00000110871.14_3 | chr12:120941077-120972237 | 0.877445918 | 0.04988016  | 0.998154148 |
| TCAIM   | ENSG00000179152.19_2 | chr3:44379611-44450943    | 0.876255874 | 0.022788154 | 0.998154148 |
| ZGRF1   | ENSG00000138658.15_3 | chr4:113460489-113558151  | 0.874672595 | 0.041201931 | 0.998154148 |
| CCDC148 | ENSG00000153237.17_2 | chr2:159027593-159313265  | 0.874317573 | 0.040879138 | 0.998154148 |
| ZNF470  | ENSG00000197016.11_3 | chr19:57078880-57100279   | 0.873837764 | 0.033241111 | 0.998154148 |
| CLCN5   | ENSG00000171365.15_3 | chrX:49687225-49863892    | 0.872365383 | 0.015183493 | 0.998154148 |
| LLPH    | ENSG00000139233.6_3  | chr12:66510335-66524548   | 0.868196543 | 0.007871643 | 0.998154148 |
| INTS6L  | ENSG00000165359.15_3 | chrX:134654568-134716435  | 0.868061629 | 0.042315812 | 0.998154148 |
| SRBD1   | ENSG00000068784.12_2 | chr2:45615819-45839304    | 0.867425699 | 0.033605132 | 0.998154148 |
| ZNF420  | ENSG00000197050.10_3 | chr19:37498759-37621216   | 0.867158359 | 0.038245875 | 0.998154148 |
| ZNF28   | ENSG00000198538.10_3 | chr19:53300662-53360853   | 0.867002109 | 0.049143936 | 0.998154148 |
| BRAP    | ENSG00000089234.15_3 | chr12:112079950-112123790 | 0.866498758 | 0.006329511 | 0.998154148 |
| COX20   | ENSG00000203667.9_2  | chr1:244998624-245008359  | 0.865615572 | 0.041589931 | 0.998154148 |
| ZNF330  | ENSG00000109445.10_3 | chr4:142142041-142155851  | 0.863654627 | 0.04641773  | 0.998154148 |
| ZNF804B | ENSG00000182348.6_2  | chr7:88388682-88966371    | 0.86354437  | 0.00437694  | 0.998154148 |
| WDR78   | ENSG00000152763.16_2 | chr1:67278568-67390570    | 0.863384059 | 0.027051146 | 0.998154148 |
| ST6GAL2 | ENSG00000144057.15_3 | chr2:107418056-107503564  | 0.863107417 | 0.036827037 | 0.998154148 |
| INTS13  | ENSG00000064102.14_2 | chr12:27058114-27091259   | 0.862602546 | 0.033613575 | 0.998154148 |
| ING3    | ENSG00000071243.15_2 | chr7:120590803-120617270  | 0.862200451 | 0.020259214 | 0.998154148 |
| FAM184B | ENSG00000047662.4_2  | chr4:17630929-17783135    | 0.861703971 | 0.030293451 | 0.998154148 |
| ZNF749  | ENSG00000186230.6_3  | chr19:57946697-57956853   | 0.861197561 | 0.049969053 | 0.998154148 |
| NRF1    | ENSG00000106459.14_2 | chr7:129251555-129396922  | 0.861126787 | 0.029941728 | 0.998154148 |
| ZNF571  | ENSG00000180479.13_2 | chr19:38045684-38085691   | 0.859541772 | 0.038220795 | 0.998154148 |
| HAT1    | ENSG00000128708.12_2 | chr2:172778958-172848596  | 0.859147955 | 0.032231134 | 0.998154148 |
| SNX25   | ENSG00000109762.15_2 | chr4:186125391-186291339  | 0.859118875 | 0.018687806 | 0.998154148 |
| SYDE2   | ENSG00000097096.8_2  | chr1:85622556-85666729    | 0.856872991 | 0.035663879 | 0.998154148 |
| EXOSC8  | ENSG00000120699.12_3 | chr13:37572953-37583750   | 0.8565462   | 0.042749302 | 0.998154148 |
| C5      | ENSG00000106804.7_2  | chr9:123714613-123812554  | 0.856292725 | 0.011729918 | 0.998154148 |
| WNK3    | ENSG00000196632.10_3 | chrX:54219256-54385075    | 0.855529679 | 0.036951048 | 0.998154148 |
| ZBTB26  | ENSG00000171448.8_2  | chr9:125677845-125693779  | 0.855460372 | 0.048767298 | 0.998154148 |
| ZNF143  | ENSG00000166478.9_3  | chr11:9481866-9550071     | 0.855069345 | 0.016542077 | 0.998154148 |
| TMEM138 | ENSG00000149483.11_2 | chr11:61129473-61136981   | 0.854565311 | 0.02570802  | 0.998154148 |
| RPIA    | ENSG00000153574.8_2  | chr2:88991162-89050452    | 0.853072317 | 0.036995561 | 0.998154148 |
| SPRED2  | ENSG00000198369.9_3  | chr2:65537985-65659771    | 0.852810015 | 0.04134861  | 0.998154148 |
| ZNF549  | ENSG00000121406.8_2  | chr19:58038693-58068910   | 0.852415333 | 0.027971884 | 0.998154148 |

|          |                      |                           |             |             |             |
|----------|----------------------|---------------------------|-------------|-------------|-------------|
| TBCCD1   | ENSG00000113838.12_3 | chr3:186263862-186288332  | 0.852282031 | 0.022906767 | 0.998154148 |
| ZSCAN21  | ENSG00000166529.14_2 | chr7:99647397-99662661    | 0.852144054 | 0.005769904 | 0.998154148 |
| ZNF10    | ENSG00000256223.5_3  | chr12:133707161-133736051 | 0.852033858 | 0.049823058 | 0.998154148 |
| SEL1L3   | ENSG00000091490.10_3 | chr4:25749049-25865382    | 0.851896384 | 0.030046817 | 0.998154148 |
| GNPAT    | ENSG00000116906.11_3 | chr1:231376953-231413719  | 0.851323487 | 0.046747047 | 0.998154148 |
| PYROXD1  | ENSG00000121350.15_2 | chr12:21590549-21624186   | 0.850813366 | 0.026805023 | 0.998154148 |
| DCAF17   | ENSG00000115827.13_3 | chr2:172290727-172341562  | 0.850640374 | 0.022532351 | 0.998154148 |
| DHFR2    | ENSG00000178700.7_3  | chr3:93766680-93782233    | 0.850253114 | 0.011485906 | 0.998154148 |
| ZNF322   | ENSG00000181315.10_3 | chr6:26634611-26659980    | 0.850106466 | 0.039396684 | 0.998154148 |
| WASHC3   | ENSG00000120860.10_3 | chr12:102406705-102455927 | 0.850001287 | 0.024321285 | 0.998154148 |
| S100PBP  | ENSG00000116497.17_3 | chr1:33282368-33324480    | 0.849946658 | 0.045894145 | 0.998154148 |
| THADA    | ENSG00000115970.18_3 | chr2:43457975-43823185    | 0.84859352  | 0.013666855 | 0.998154148 |
| NUDT15   | ENSG00000136159.3_2  | chr13:48611703-48621358   | 0.848000137 | 0.041287143 | 0.998154148 |
| CNTNAP3B | ENSG00000154529.10   | chr9:43684902-43924049    | 0.847475962 | 0.039200767 | 0.998154148 |
| POLR1B   | ENSG00000125630.15_2 | chr2:113299492-113334727  | 0.847428265 | 0.021118645 | 0.998154148 |
| TTPA     | ENSG00000137561.4_2  | chr8:63961112-63998612    | 0.84488278  | 0.037238954 | 0.998154148 |
| RBM34    | ENSG00000188739.14_3 | chr1:235294498-235324772  | 0.844852633 | 0.025783746 | 0.998154148 |
| SOX6     | ENSG00000110693.17_3 | chr11:15987995-16761138   | 0.844156122 | 0.016625836 | 0.998154148 |
| ZNF610   | ENSG00000167554.14_2 | chr19:52839498-52871031   | 0.843991324 | 0.024844326 | 0.998154148 |
| KIAA1143 | ENSG00000163807.5_2  | chr3:44779153-44803154    | 0.843458346 | 0.047586775 | 0.998154148 |
| FAAH2    | ENSG00000165591.6_2  | chrX:57313139-57515629    | 0.842938279 | 0.033542833 | 0.998154148 |
| UBXN8    | ENSG00000104691.14_3 | chr8:30589764-30624522    | 0.842705342 | 0.03706639  | 0.998154148 |
| NECTIN3  | ENSG00000177707.10_3 | chr3:110788918-110994410  | 0.841803775 | 0.021271187 | 0.998154148 |
| FXN      | ENSG00000165060.11_3 | chr9:71650175-71715094    | 0.841145026 | 0.006870013 | 0.998154148 |
| MNAT1    | ENSG0000020426.10_3  | chr14:61201460-61436671   | 0.84060604  | 0.03447681  | 0.998154148 |
| SDHC     | ENSG00000143252.14_2 | chr1:161284047-161345130  | 0.840134938 | 0.017708017 | 0.998154148 |
| ZNF761   | ENSG00000160336.14_3 | chr19:53935246-53961515   | 0.83957076  | 0.042689333 | 0.998154148 |
| ZNF468   | ENSG00000204604.9_3  | chr19:53341261-53360902   | 0.838670553 | 0.0214953   | 0.998154148 |
| KLHL20   | ENSG00000076321.10_3 | chr1:173684080-173755840  | 0.83782626  | 0.011677379 | 0.998154148 |
| U2AF1L5  | ENSG00000275895.6_4  | chr21:44513066-44527693   | 0.837420787 | 0.033815163 | 0.998154148 |
| NT5E     | ENSG00000135318.11_3 | chr6:86159302-86205509    | 0.835936472 | 0.015883428 | 0.998154148 |
| ZNF415   | ENSG00000170954.11_4 | chr19:53611132-53636330   | 0.835774411 | 0.036544448 | 0.998154148 |
| ZNF883   | ENSG00000228623.5_1  | chr9:115720002-115812323  | 0.835513559 | 0.035661451 | 0.998154148 |
| BDNF     | ENSG00000176697.18_3 | chr11:27676440-27743605   | 0.835200945 | 0.03308505  | 0.998154148 |
| TIMMDC1  | ENSG00000113845.9_2  | chr3:119217379-119243937  | 0.835075439 | 0.022781485 | 0.998154148 |

|          |                      |                           |             |             |             |
|----------|----------------------|---------------------------|-------------|-------------|-------------|
| EPB4IL5  | ENSG00000115109.13_2 | chr2:120770581-120936695  | 0.834755246 | 0.039226633 | 0.998154148 |
| FAM206A  | ENSG00000119328.11_2 | chr9:111696461-111713024  | 0.833922498 | 0.026167117 | 0.998154148 |
| PRKD1    | ENSG00000184304.14_4 | chr14:30045685-30661104   | 0.831883887 | 0.028437524 | 0.998154148 |
| CWC25    | ENSG00000273559.4_2  | chr17:36956687-36981734   | 0.831754483 | 0.010681401 | 0.998154148 |
| MARC1    | ENSG00000186205.12_3 | chr1:220960101-220992999  | 0.831715965 | 0.018499295 | 0.998154148 |
| KIAA0586 | ENSG00000100578.14_4 | chr14:58894103-59018007   | 0.831543164 | 0.034692463 | 0.998154148 |
| PLPBP    | ENSG00000147471.11_4 | chr8:37620111-37637285    | 0.831473656 | 0.043022808 | 0.998154148 |
| LRP2BP   | ENSG00000109771.15_2 | chr4:186285033-186317053  | 0.830633737 | 0.040152033 | 0.998154148 |
| FBXO16   | ENSG00000214050.7_3  | chr8:28205804-28347835    | 0.829598375 | 0.02478746  | 0.998154148 |
| PAAF1    | ENSG00000175575.12_2 | chr11:73587744-73642169   | 0.829479609 | 0.007253391 | 0.998154148 |
| KIF27    | ENSG00000165115.14_2 | chr9:86451613-86536380    | 0.828087838 | 0.030180324 | 0.998154148 |
| VWC2L    | ENSG00000174453.9_3  | chr2:215275789-215443683  | 0.82793781  | 0.0294608   | 0.998154148 |
| PXMP2    | ENSG00000176894.9_3  | chr12:133264192-133281577 | 0.827659652 | 0.041337544 | 0.998154148 |
| TNNT1    | ENSG00000105048.16_2 | chr19:55644162-55660722   | 0.827234609 | 0.036510138 | 0.998154148 |
| DCHS2    | ENSG00000197410.12_1 | chr4:155153189-155412868  | 0.827081705 | 0.02899233  | 0.998154148 |
| BRD7     | ENSG00000166164.15_3 | chr16:50347398-50402845   | 0.826976017 | 0.034620297 | 0.998154148 |
| PEX12    | ENSG00000108733.9_3  | chr17:33901814-33905882   | 0.826933835 | 0.025111113 | 0.998154148 |
| ZNF562   | ENSG00000171466.9_3  | chr19:9752484-9785762     | 0.826073297 | 0.028263248 | 0.998154148 |
| MSH6     | ENSG00000116062.14_3 | chr2:47922669-48037240    | 0.824938523 | 0.023279416 | 0.998154148 |
| MRPS22   | ENSG00000175110.11_3 | chr3:138724648-139076065  | 0.823281569 | 0.003584798 | 0.998154148 |
| COMMD10  | ENSG00000145781.8_2  | chr5:115420688-115748459  | 0.82320552  | 0.019276292 | 0.998154148 |
| S100A13  | ENSG00000189171.14_3 | chr1:153591263-153603836  | 0.822323012 | 0.016706959 | 0.998154148 |
| TSPAN12  | ENSG00000106025.8_2  | chr7:120427374-120498456  | 0.821454208 | 0.032565656 | 0.998154148 |
| MRPL47   | ENSG00000136522.13_2 | chr3:179306073-179322442  | 0.820240262 | 0.034058717 | 0.998154148 |
| RBM28    | ENSG00000106344.8_3  | chr7:127937738-127983962  | 0.820027942 | 0.0409239   | 0.998154148 |
| SMG7     | ENSG00000116698.21_3 | chr1:183441351-183567381  | 0.819881274 | 0.032186278 | 0.998154148 |
| C12orf49 | ENSG00000111412.5_2  | chr12:117147990-117175875 | 0.819357723 | 0.017175047 | 0.998154148 |
| SLC25A33 | ENSG00000171612.6_3  | chr1:9599541-9645237      | 0.819276085 | 0.041476807 | 0.998154148 |
| LYRM2    | ENSG00000083099.10_2 | chr6:90277863-90348472    | 0.817864529 | 0.008061349 | 0.998154148 |
| PHACTR2  | ENSG00000112419.14_3 | chr6:143857982-144152322  | 0.817641259 | 0.02680242  | 0.998154148 |
| ADHFE1   | ENSG00000147576.15_3 | chr8:67342420-67383836    | 0.817189796 | 0.008036173 | 0.998154148 |
| ZNF334   | ENSG00000198185.11_3 | chr20:45128269-45142198   | 0.816737908 | 0.019624702 | 0.998154148 |
| TAF11    | ENSG00000064995.16_2 | chr6:34845555-34855866    | 0.816081323 | 0.025533362 | 0.998154148 |
| UBXN2A   | ENSG00000173960.13_3 | chr2:24150155-24227779    | 0.815206282 | 0.008464835 | 0.998154148 |
| ZNF614   | ENSG00000142556.18_3 | chr19:52516018-52533493   | 0.812879662 | 0.011409011 | 0.998154148 |

|            |                      |                           |             |             |             |
|------------|----------------------|---------------------------|-------------|-------------|-------------|
| UTP6       | ENSG00000108651.9_2  | chr17:30187918-30228784   | 0.812707045 | 0.018120549 | 0.998154148 |
| PLCH1      | ENSG00000114805.16_3 | chr3:155093369-155462856  | 0.812145362 | 0.044987961 | 0.998154148 |
| PRELID3A   | ENSG00000141391.13_3 | chr18:12407895-12432237   | 0.810555804 | 0.022078299 | 0.998154148 |
| ZFP3       | ENSG00000180787.5_2  | chr17:4981543-4999669     | 0.809872741 | 0.005821418 | 0.998154148 |
| NDUFAF7    | ENSG00000003509.15_2 | chr2:37458774-37480546    | 0.809738934 | 0.028668135 | 0.998154148 |
| LRRC6      | ENSG00000129295.8_2  | chr8:133584201-133687863  | 0.807175474 | 0.048213135 | 0.998154148 |
| ZW10       | ENSG00000086827.8_3  | chr11:113603909-113644533 | 0.807066572 | 0.014907383 | 0.998154148 |
| MIS12      | ENSG00000167842.15_2 | chr17:5389605-5394134     | 0.806987816 | 0.008428619 | 0.998154148 |
| TRIB2      | ENSG00000071575.11_2 | chr2:12857015-12882860    | 0.804887983 | 0.040491981 | 0.998154148 |
| AC004076.1 | ENSG00000268163.1_4  | chr19:57949338-57988904   | 0.804581253 | 0.017412907 | 0.998154148 |
| RGPD3      | ENSG00000153165.18_2 | chr2:107007746-107084832  | 0.803091307 | 0.043208367 | 0.998154148 |
| AL121845.3 | ENSG00000273154.3_4  | chr20:62340216-62370456   | 0.80126645  | 0.037421084 | 0.998154148 |
| SRP19      | ENSG00000153037.13_3 | chr5:112196919-112205485  | 0.800697338 | 0.0489681   | 0.998154148 |
| HSD17B6    | ENSG00000025423.11_3 | chr12:57145945-57181574   | 0.800373574 | 0.039449677 | 0.998154148 |
| AC018630.6 | ENSG00000275778.1_4  | chr12:10998448-11324197   | 0.800002824 | 0.015909879 | 0.998154148 |
| RPF2       | ENSG00000197498.12_2 | chr6:111303218-111349466  | 0.79908781  | 0.044183911 | 0.998154148 |
| PAK1IP1    | ENSG00000111845.4_2  | chr6:10694928-10710015    | 0.797721913 | 0.013261023 | 0.998154148 |
| VWA8       | ENSG00000102763.17_3 | chr13:42140973-42535256   | 0.797470431 | 0.007075448 | 0.998154148 |
| SPRY2      | ENSG00000136158.11_3 | chr13:80910111-80915086   | 0.795991401 | 0.011348033 | 0.998154148 |
| ETV1       | ENSG00000006468.13_2 | chr7:13930853-14031050    | 0.793589732 | 0.02766108  | 0.998154148 |
| PDSS1      | ENSG00000148459.15_3 | chr10:26986588-27035727   | 0.791703822 | 0.01275175  | 0.998154148 |
| ZNF302     | ENSG00000089335.20_3 | chr19:35168544-35177302   | 0.791464577 | 0.025360148 | 0.998154148 |
| USPL1      | ENSG00000132952.11_2 | chr13:31191830-31234907   | 0.788301055 | 0.041974079 | 0.998154148 |
| USP18      | ENSG00000184979.9_2  | chr22:18632666-18660164   | 0.787897784 | 0.003205706 | 0.998154148 |
| CEBPZ      | ENSG00000115816.14_3 | chr2:37428755-37458856    | 0.787511339 | 0.045209765 | 0.998154148 |
| BLZF1      | ENSG00000117475.13_2 | chr1:169337208-169365778  | 0.786436941 | 0.033047401 | 0.998154148 |
| SELENOT    | ENSG00000198843.12_3 | chr3:150320662-150348232  | 0.780810525 | 0.030589203 | 0.998154148 |
| MPHOSPH8   | ENSG00000196199.13_2 | chr13:20207821-20247599   | 0.778988661 | 0.039299165 | 0.998154148 |
| ZNF484     | ENSG00000127081.13_2 | chr9:95607313-95640320    | 0.778441553 | 0.032061778 | 0.998154148 |
| C8orf4     | ENSG00000176907.4_2  | chr8:40010974-40012827    | 0.77821368  | 0.006847759 | 0.998154148 |
| PDCD6IP    | ENSG00000170248.13_2 | chr3:33839844-33911199    | 0.777223064 | 0.006442322 | 0.998154148 |
| TMEM254    | ENSG00000133678.13_3 | chr10:81838402-81852313   | 0.776132899 | 0.00496647  | 0.998154148 |
| TAS2R5     | ENSG00000127366.5_2  | chr7:141490017-141491167  | 0.775416025 | 0.042789881 | 0.998154148 |
| LRRC37A    | ENSG00000176681.14_2 | chr17:44370099-44415160   | 0.774183314 | 0.0381071   | 0.998154148 |
| SLC4A8     | ENSG00000050438.16_2 | chr12:51785101-51909547   | 0.772767428 | 0.041781165 | 0.998154148 |

|            |                      |                           |             |             |             |
|------------|----------------------|---------------------------|-------------|-------------|-------------|
| DPH3       | ENSG00000154813.9_2  | chr3:16299485-16306479    | 0.771048729 | 0.00336707  | 0.998154148 |
| TMEM126A   | ENSG00000171202.6_2  | chr11:85359011-85367591   | 0.768098469 | 0.029954166 | 0.998154148 |
| FGD6       | ENSG00000180263.13_3 | chr12:95470525-95611258   | 0.767550409 | 0.032563425 | 0.998154148 |
| BDH2       | ENSG00000164039.14_3 | chr4:104000592-104021040  | 0.76618433  | 0.026098732 | 0.998154148 |
| AL513165.2 | ENSG00000256966.6_4  | chr9:37512544-37592466    | 0.765501781 | 0.037636186 | 0.998154148 |
| ZNF32      | ENSG00000169740.13_2 | chr10:44139307-44144304   | 0.764235273 | 0.008265639 | 0.998154148 |
| ENDOU      | ENSG00000111405.8_2  | chr12:48103517-48119350   | 0.76297606  | 0.008070261 | 0.998154148 |
| SLN        | ENSG00000170290.3_2  | chr11:107578104-107590419 | 0.762697314 | 0.030907623 | 0.998154148 |
| OR2W3      | ENSG00000238243.3_2  | chr1:248058889-248059833  | 0.761683655 | 0.021253529 | 0.998154148 |
| DNAJA4     | ENSG00000140403.12_2 | chr15:78556428-78574538   | 0.76013059  | 0.040997887 | 0.998154148 |
| LRRC37A2   | ENSG00000238083.7_2  | chr17:44588877-44633016   | 0.75918872  | 0.029176016 | 0.998154148 |
| CCDC167    | ENSG00000198937.8_2  | chr6:37450696-37467698    | 0.758738525 | 0.049893105 | 0.998154148 |
| OTOGL      | ENSG00000165899.10_2 | chr12:80603233-80772870   | 0.758383143 | 0.0073387   | 0.998154148 |
| FP15737    | ENSG00000215298.3    | chr8:23430157-23432974    | 0.751653359 | 0.029617859 | 0.998154148 |
| ACAD11     | ENSG00000240303.7_3  | chr3:132276982-132379567  | 0.750470175 | 0.048358226 | 0.998154148 |
| RBBP4      | ENSG00000162521.18_3 | chr1:33116743-33151812    | 0.749822389 | 0.020815195 | 0.998154148 |
| HSPD1      | ENSG00000144381.16_3 | chr2:198351305-198381461  | 0.745771365 | 0.023242035 | 0.998154148 |
| TOGARAM1   | ENSG00000198718.12_3 | chr14:45431411-45543634   | 0.743039018 | 0.009521289 | 0.998154148 |
| GSTM5      | ENSG00000134201.10_3 | chr1:110254877-110318050  | 0.740939805 | 0.035152072 | 0.998154148 |
| FSBP       | ENSG00000265817.2_3  | chr8:95384398-95449180    | 0.739829097 | 0.019761943 | 0.998154148 |
| PPARA      | ENSG00000186951.16_3 | chr22:46546424-46639653   | 0.736169585 | 0.044314345 | 0.998154148 |
| QSER1      | ENSG00000060749.14_2 | chr11:32914724-33014862   | 0.735464221 | 0.038886837 | 0.998154148 |
| FABP6      | ENSG00000170231.15_2 | chr5:159614374-159665742  | 0.731863888 | 0.028418238 | 0.998154148 |
| ZNF709     | ENSG00000242852.6_3  | chr19:12571998-12624668   | 0.71556927  | 0.007476814 | 0.998154148 |
| RALB       | ENSG00000144118.13_3 | chr2:120997640-121052289  | 0.714954298 | 0.025116048 | 0.998154148 |
| DUSP6      | ENSG00000139318.7_2  | chr12:89741009-89747048   | 0.713571153 | 0.024744029 | 0.998154148 |
| MDM4       | ENSG00000198625.12_2 | chr1:204485507-204527248  | 0.70941623  | 0.013522487 | 0.998154148 |
| FCF1       | ENSG00000119616.11_2 | chr14:75179847-75205323   | 0.702405537 | 0.008291242 | 0.998154148 |
| NME1-NME2  | ENSG00000011052.21_3 | chr17:49230951-49249105   | 0.651236153 | 0.049573833 | 0.998154148 |
| MKLN1      | ENSG00000128585.17_3 | chr7:130794855-131181395  | 0.630768248 | 0.014691013 | 0.998154148 |
| AL662899.3 | ENSG00000263020.6_4  | chr6:31633879-31641323    | 0.522821095 | 0.014578824 | 0.998154148 |
| AD000671.1 | ENSG00000188223.9_4  | chr19:36236579-36245420   | 0.491543271 | 0.015996805 | 0.998154148 |



**Table S4. All significantly up- and down-regulated genes in the synaptic fraction**

| Gene symbol               | Ensemble ID          | Locus                    | Fold change | p-Value   | q-Value     |
|---------------------------|----------------------|--------------------------|-------------|-----------|-------------|
| <b>Up-regulated genes</b> |                      |                          |             |           |             |
| ZFP36                     | ENSG00000128016.5_2  | chr19:39897453-39900052  | 2.1776576   | 0.0275288 | 0.999912394 |
| C1QB                      | ENSG00000173369.15_2 | chr1:22979255-22988031   | 2.0394579   | 0.0465707 | 0.999912394 |
| CHTF8                     | ENSG00000168802.12_3 | chr16:69151913-69166487  | 1.8470062   | 0.0174307 | 0.999912394 |
| RASD1                     | ENSG00000108551.4_2  | chr17:17397751-17399709  | 1.8322651   | 0.0081353 | 0.999912394 |
| CEBPD                     | ENSG00000221869.4_2  | chr8:48649471-48651648   | 1.7427126   | 0.0399716 | 0.999912394 |
| TMEM88B                   | ENSG00000205116.3_2  | chr1:1361508-1363167     | 1.7405742   | 0.0093953 | 0.999912394 |
| KIF19                     | ENSG00000196169.14_2 | chr17:72322349-72351959  | 1.7176642   | 0.0061926 | 0.999912394 |
| MOG                       | ENSG00000204655.11_3 | chr6:29624758-29640149   | 1.6982876   | 0.0446928 | 0.999912394 |
| S100A9                    | ENSG00000163220.10_2 | chr1:153330330-153333503 | 1.6963496   | 0.0214211 | 0.999912394 |
| RGS16                     | ENSG00000143333.6_2  | chr1:182567758-182573543 | 1.6860759   | 0.020914  | 0.999912394 |
| HAPLN2                    | ENSG00000132702.12_2 | chr1:156589086-156595517 | 1.660522    | 0.0399065 | 0.999912394 |
| CX3CL1                    | ENSG00000006210.6_2  | chr16:57406370-57418960  | 1.6509677   | 0.0164296 | 0.999912394 |
| GALNT15                   | ENSG00000131386.17_2 | chr3:16216156-16273499   | 1.6278187   | 0.0268205 | 0.999912394 |
| SLC2A5                    | ENSG00000142583.17_3 | chr1:9095166-9148537     | 1.6249166   | 0.003212  | 0.999912394 |
| ADNP2                     | ENSG00000101544.8_2  | chr18:77866915-77905406  | 1.5810882   | 0.0164974 | 0.999912394 |
| CD68                      | ENSG00000129226.13_3 | chr17:7482785-7485431    | 1.5771296   | 0.0423986 | 0.999912394 |
| FPR1                      | ENSG00000171051.8_3  | chr19:52248425-52307363  | 1.5668887   | 0.007887  | 0.999912394 |
| CDC42EP1                  | ENSG00000128283.6_4  | chr22:37956454-37965412  | 1.5649011   | 0.0222008 | 0.999912394 |
| TYROBP                    | ENSG00000011600.11_2 | chr19:36395303-36399197  | 1.5585077   | 0.022949  | 0.999912394 |
| PRIMA1                    | ENSG00000175785.12_2 | chr14:94184644-94254827  | 1.5531521   | 0.0295804 | 0.999912394 |
| SMOC1                     | ENSG00000198732.10_2 | chr14:70320848-70499083  | 1.5367045   | 0.0062641 | 0.999912394 |
| HIST1H3D                  | ENSG00000197409.7_3  | chr6:26197068-26197478   | 1.5350196   | 0.0125672 | 0.999912394 |
| AL136376.1                | ENSG00000269279.1    | chr1:116915890-116926718 | 1.5307629   | 0.0418539 | 0.999912394 |
| CBR1                      | ENSG00000159228.12_2 | chr21:37442239-37445464  | 1.5095717   | 0.0023686 | 0.999912394 |
| AC006486.1                | ENSG00000268643.1_4  | chr19:42738735-42759284  | 1.5061942   | 0.0058379 | 0.999912394 |
| PRR18                     | ENSG00000176381.5_3  | chr6:166718788-166721936 | 1.5019354   | 0.0063391 | 0.999912394 |
| EDIL3                     | ENSG00000164176.12_3 | chr5:83236373-83680611   | 1.4997978   | 0.0429222 | 0.999912394 |
| ITGB2                     | ENSG00000160255.17_3 | chr21:46305868-46351904  | 1.4975076   | 0.0450782 | 0.999912394 |
| GPIHBP1                   | ENSG00000277494.1_2  | chr8:144295068-144299044 | 1.4970042   | 0.0161025 | 0.999912394 |
| RTKN                      | ENSG00000114993.16_2 | chr2:74652963-74669549   | 1.4941954   | 0.0054524 | 0.999912394 |

|            |                      |                           |           |           |             |
|------------|----------------------|---------------------------|-----------|-----------|-------------|
| SLC11A1    | ENSG00000018280.16_2 | chr2:219246752-219261617  | 1.478482  | 0.0411049 | 0.999912394 |
| SPI1       | ENSG00000066336.11_2 | chr11:47376411-47400127   | 1.4699304 | 0.0291721 | 0.999912394 |
| LDB3       | ENSG00000122367.19_3 | chr10:88428206-88495825   | 1.4638139 | 0.0148954 | 0.999912394 |
| RHOA       | ENSG00000116574.5_2  | chr1:228870824-228882416  | 1.4572597 | 0.0028964 | 0.999912394 |
| HCLS1      | ENSG00000180353.10_2 | chr3:121350246-121379774  | 1.4534723 | 0.0302514 | 0.999912394 |
| GPX1       | ENSG00000233276.3_3  | chr3:49394609-49396033    | 1.4522081 | 0.0247716 | 0.999912394 |
| AC073896.1 | ENSG00000144785.8_4  | chr12:56679700-56709843   | 1.4457229 | 0.0296458 | 0.999912394 |
| SH3PXD2B   | ENSG00000174705.12_3 | chr5:171752004-171881527  | 1.4452584 | 0.0450207 | 0.999912394 |
| TSPAN15    | ENSG00000099282.9_3  | chr10:71211229-71267425   | 1.4395893 | 0.0331081 | 0.999912394 |
| FERMT3     | ENSG00000149781.12_3 | chr11:63974150-63991358   | 1.4365096 | 0.039016  | 0.999912394 |
| ECHDC3     | ENSG00000134463.14_3 | chr10:11784365-11806069   | 1.4311422 | 0.0008299 | 0.999912394 |
| DEF6       | ENSG00000023892.10_2 | chr6:35265629-35289548    | 1.422364  | 0.0065991 | 0.999912394 |
| PHLDB1     | ENSG00000019144.18_3 | chr11:118477155-118528748 | 1.411454  | 0.0223944 | 0.999912394 |
| CXCL16     | ENSG00000161921.14_3 | chr17:4636821-4643217     | 1.4082337 | 0.0339933 | 0.999912394 |
| HBEGF      | ENSG00000113070.7_2  | chr5:139712428-139726216  | 1.4071037 | 0.0178945 | 0.999912394 |
| MAP2K3     | ENSG00000034152.18_3 | chr17:21187984-21218552   | 1.4012996 | 0.0122844 | 0.999912394 |
| AKIRIN1    | ENSG00000174574.15_3 | chr1:39456895-39471731    | 1.394551  | 0.0175371 | 0.999912394 |
| INSIG1     | ENSG00000186480.12_3 | chr7:155089486-155101945  | 1.3942983 | 0.0419544 | 0.999912394 |
| PIM1       | ENSG00000137193.13_2 | chr6:37137979-37143202    | 1.3910995 | 0.0439518 | 0.999912394 |
| CD59       | ENSG00000085063.14_3 | chr11:33719807-33757991   | 1.3892392 | 0.0317052 | 0.999912394 |
| OPALIN     | ENSG00000197430.10_2 | chr10:98102973-98119122   | 1.3824273 | 0.0413411 | 0.999912394 |
| SHROOM4    | ENSG00000158352.15_2 | chrX:50334647-50557302    | 1.3807606 | 0.0400913 | 0.999912394 |
| DBNDD2     | ENSG00000244274.7_3  | chr20:44034697-44039250   | 1.3799971 | 0.0368782 | 0.999912394 |
| GNPMB      | ENSG00000136235.15_3 | chr7:23275586-23314727    | 1.3790575 | 0.0212324 | 0.999912394 |
| TRAF4      | ENSG00000076604.14_3 | chr17:27071002-27077976   | 1.3779663 | 0.0069576 | 0.999912394 |
| SIGLEC9    | ENSG00000129450.8_2  | chr19:51628165-51639908   | 1.3767954 | 0.0321491 | 0.999912394 |
| GSN        | ENSG00000148180.19_3 | chr9:123970072-124095121  | 1.3707911 | 0.0346081 | 0.999912394 |
| PDE4B      | ENSG00000184588.17_3 | chr1:66258197-66840262    | 1.3698842 | 0.0454108 | 0.999912394 |
| ELOVL1     | ENSG00000066322.14_3 | chr1:43829068-43833745    | 1.3657649 | 0.047326  | 0.999912394 |
| HIF0       | ENSG00000189060.5_2  | chr22:38201100-38203443   | 1.3602022 | 0.0042927 | 0.999912394 |
| SGK2       | ENSG00000101049.14_3 | chr20:42187608-42216877   | 1.3572334 | 0.0484886 | 0.999912394 |
| WIPF1      | ENSG00000115935.17_4 | chr2:175424300-175547644  | 1.353282  | 0.0052749 | 0.999912394 |
| PXDC1      | ENSG00000168994.13_2 | chr6:3722848-3752260      | 1.3525253 | 0.0457249 | 0.999912394 |
| C5AR1      | ENSG00000197405.7_3  | chr19:47793280-47825323   | 1.3483603 | 0.0297668 | 0.999912394 |
| RNASET2    | ENSG00000026297.15_3 | chr6:167342992-167370679  | 1.3462312 | 0.0442161 | 0.999912394 |

|           |                      |                           |           |           |             |
|-----------|----------------------|---------------------------|-----------|-----------|-------------|
| ZBED3     | ENSG00000132846.5_4  | chr5:76367897-76383148    | 1.3454267 | 0.0008996 | 0.999912394 |
| PIP4K2A   | ENSG00000150867.13_3 | chr10:22823778-23003484   | 1.3430789 | 0.0118545 | 0.999912394 |
| GSG1L     | ENSG00000169181.12_4 | chr16:27798856-28074830   | 1.3406162 | 0.0007414 | 0.999912394 |
| SNU13     | ENSG00000100138.13_2 | chr22:42069934-42086508   | 1.338581  | 0.0128383 | 0.999912394 |
| RASSF2    | ENSG00000101265.15_2 | chr20:4760669-4804291     | 1.3380231 | 0.0125459 | 0.999912394 |
| CDKN1C    | ENSG00000129757.12_2 | chr11:2904443-2907111     | 1.3369348 | 0.0446486 | 0.999912394 |
| ZBTB43    | ENSG00000169155.9_3  | chr9:129567285-129600489  | 1.3366042 | 0.0234785 | 0.999912394 |
| MTA2      | ENSG00000149480.6_2  | chr11:62360686-62369312   | 1.3318732 | 0.039548  | 0.999912394 |
| MAL       | ENSG00000172005.10_2 | chr2:95691422-95719741    | 1.3315349 | 0.0474162 | 0.999912394 |
| SLCO1A2   | ENSG00000084453.16_3 | chr12:21417534-21572528   | 1.3277406 | 0.0111242 | 0.999912394 |
| SOX8      | ENSG00000005513.9_2  | chr16:1031808-1036979     | 1.3246712 | 0.012971  | 0.999912394 |
| SERINC5   | ENSG00000164300.16_2 | chr5:79407474-79551898    | 1.3231909 | 0.0397174 | 0.999912394 |
| SLC25A1   | ENSG00000100075.9_2  | chr22:19163088-19166343   | 1.3223847 | 0.0257429 | 0.999912394 |
| SNAI1     | ENSG00000124216.3_2  | chr20:48599536-48605423   | 1.3216293 | 0.0250616 | 0.999912394 |
| N4BP2L1   | ENSG00000139597.17_3 | chr13:32974860-33002448   | 1.3213328 | 0.0269505 | 0.999912394 |
| TLR2      | ENSG00000137462.6_2  | chr4:154622652-154626851  | 1.3203869 | 0.0323141 | 0.999912394 |
| GTF2H3    | ENSG00000111358.13_3 | chr12:124118286-124147153 | 1.3202115 | 0.0160122 | 0.999912394 |
| OTUD7B    | ENSG00000264522.5_2  | chr1:149909705-149982625  | 1.3174402 | 0.0370509 | 0.999912394 |
| RELA      | ENSG00000173039.18_3 | chr11:65421067-65430565   | 1.3140115 | 0.0256881 | 0.999912394 |
| MSLN      | ENSG00000102854.15_3 | chr16:810762-818865       | 1.3129353 | 0.0317411 | 0.999912394 |
| SPATA13   | ENSG00000182957.15_3 | chr13:24553944-24881212   | 1.3113199 | 0.027528  | 0.999912394 |
| WASF2     | ENSG00000158195.10_2 | chr1:27730730-27816669    | 1.3082764 | 0.032357  | 0.999912394 |
| TNFRSF10B | ENSG00000120889.12_2 | chr8:22877646-22926692    | 1.3079724 | 0.0392618 | 0.999912394 |
| IRF2      | ENSG00000168310.10_3 | chr4:185308867-185395734  | 1.3031339 | 0.0051633 | 0.999912394 |
| B3GNT9    | ENSG00000237172.3_2  | chr16:67182008-67185117   | 1.3028737 | 0.0483316 | 0.999912394 |
| MICALL1   | ENSG00000100139.13_3 | chr22:38301664-38338829   | 1.3026413 | 0.0102863 | 0.999912394 |
| CDC42SE1  | ENSG00000197622.12_2 | chr1:151023447-151042801  | 1.3025141 | 0.043694  | 0.999912394 |
| NUAK2     | ENSG00000163545.8_2  | chr1:205271187-205290919  | 1.2999699 | 0.0153594 | 0.999912394 |
| SSH3      | ENSG00000172830.12_3 | chr11:67070919-67080078   | 1.2998803 | 0.0098709 | 0.999912394 |
| TFEB      | ENSG00000112561.17_3 | chr6:41651716-41703997    | 1.2944792 | 0.0053913 | 0.999912394 |
| PTPRH     | ENSG00000080031.9_3  | chr19:55692616-55720874   | 1.2943289 | 0.0371086 | 0.999912394 |
| FCHSD1    | ENSG00000197948.10_2 | chr5:141018869-141030986  | 1.2928176 | 0.0212076 | 0.999912394 |
| PTPRC     | ENSG00000081237.18_3 | chr1:198607801-198726412  | 1.2926396 | 0.0250106 | 0.999912394 |
| IRF1      | ENSG00000125347.13_3 | chr5:131817301-131826490  | 1.2895121 | 0.049636  | 0.999912394 |
| NFAM1     | ENSG00000235568.6_2  | chr22:42776416-42828401   | 1.2886583 | 0.0359893 | 0.999912394 |

|            |                      |                           |           |           |             |
|------------|----------------------|---------------------------|-----------|-----------|-------------|
| JPT2       | ENSG00000206053.12_4 | chr16:1728257-1752281     | 1.2886282 | 0.0119669 | 0.999912394 |
| SMAD9      | ENSG00000120693.13_3 | chr13:37418968-37494902   | 1.2882305 | 0.0147515 | 0.999912394 |
| SH3BP4     | ENSG00000130147.15_3 | chr2:235860617-235964358  | 1.28803   | 0.0174714 | 0.999912394 |
| INPP1      | ENSG00000151689.12_2 | chr2:191208196-191236391  | 1.2871267 | 0.043256  | 0.999912394 |
| ELF1       | ENSG00000120690.15_3 | chr13:41506164-41635576   | 1.2832428 | 0.0154785 | 0.999912394 |
| CORO1B     | ENSG00000172725.13_3 | chr11:67202981-67211292   | 1.2821114 | 0.0320307 | 0.999912394 |
| CHMP2B     | ENSG00000083937.8_2  | chr3:87276421-87304698    | 1.2804737 | 0.0230209 | 0.999912394 |
| ELK1       | ENSG00000126767.17_2 | chrX:47494920-47510003    | 1.2792851 | 0.0494165 | 0.999912394 |
| NDRG1      | ENSG00000104419.14_4 | chr8:134249414-134314265  | 1.2788627 | 0.0467802 | 0.999912394 |
| KIF13B     | ENSG00000197892.12_2 | chr8:28924796-29120641    | 1.2781564 | 0.0141405 | 0.999912394 |
| FAM198A    | ENSG00000144649.8_4  | chr3:43020759-43101703    | 1.276496  | 0.0247417 | 0.999912394 |
| TMEM98     | ENSG00000006042.11_2 | chr17:31254928-31272124   | 1.2762245 | 0.0481177 | 0.999912394 |
| ADGRE5     | ENSG00000123146.19_3 | chr19:14491313-14519537   | 1.2758758 | 0.0162438 | 0.999912394 |
| ADIPOR2    | ENSG00000006831.9_2  | chr12:1797740-1897844     | 1.2755488 | 0.0287699 | 0.999912394 |
| H2AFJ      | ENSG00000246705.4_3  | chr12:14927317-14930936   | 1.2740466 | 0.0205642 | 0.999912394 |
| DUSP16     | ENSG00000111266.8_3  | chr12:12627144-12715317   | 1.2739273 | 0.0112589 | 0.999912394 |
| AC009690.1 | ENSG00000260729.1_4  | chr15:72577068-72668322   | 1.2736923 | 0.0467613 | 0.999912394 |
| MSR1       | ENSG00000038945.14_3 | chr8:15965387-16424999    | 1.2736773 | 0.0492673 | 0.999912394 |
| LCP1       | ENSG00000136167.13_3 | chr13:46700055-46786006   | 1.2736568 | 0.0283315 | 0.999912394 |
| TMCC3      | ENSG00000057704.12_3 | chr12:94960900-95044338   | 1.2729291 | 0.0284203 | 0.999912394 |
| BHLHE41    | ENSG00000123095.5_2  | chr12:26272959-26278060   | 1.2717088 | 0.0085049 | 0.999912394 |
| RWDD3      | ENSG00000122481.16_3 | chr1:95699711-95712781    | 1.2711802 | 0.0471943 | 0.999912394 |
| HNRNPA1L2  | ENSG00000139675.11_3 | chr13:53214921-53217931   | 1.2695678 | 0.0144244 | 0.999912394 |
| C11orf57   | ENSG00000150776.17_3 | chr11:111944810-111955874 | 1.2688734 | 0.0100756 | 0.999912394 |
| SHMT1      | ENSG00000176974.19_3 | chr17:18231174-18266877   | 1.2677934 | 0.0410607 | 0.999912394 |
| LEMD2      | ENSG00000161904.11_3 | chr6:33738979-33756913    | 1.2642032 | 0.045934  | 0.999912394 |
| RPS15      | ENSG00000115268.9_4  | chr19:1438357-1440493     | 1.2641858 | 0.0312018 | 0.999912394 |
| SLA        | ENSG00000155926.13_3 | chr8:134048969-134115298  | 1.2603458 | 0.0320541 | 0.999912394 |
| NPC2       | ENSG00000119655.10_3 | chr14:74942895-74960880   | 1.2570853 | 0.0346297 | 0.999912394 |
| TCP11L2    | ENSG00000166046.10_3 | chr12:106695707-106740793 | 1.2566249 | 0.0280612 | 0.999912394 |
| JMJD4      | ENSG00000081692.12_2 | chr1:227918126-227923112  | 1.2547875 | 0.0138267 | 0.999912394 |
| ST20-MTHFS | ENSG00000259332.3_3  | chr15:80137492-80216096   | 1.2538705 | 0.0465473 | 0.999912394 |
| RNASE4     | ENSG00000258818.3_3  | chr14:21152259-21169374   | 1.2534573 | 0.0148222 | 0.999912394 |
| ERRFI1     | ENSG00000116285.12_2 | chr1:8064464-8086368      | 1.2530838 | 0.0370586 | 0.999912394 |
| SHKBP1     | ENSG00000160410.14_3 | chr19:41082757-41097305   | 1.252883  | 0.0349054 | 0.999912394 |

|         |                      |                           |           |           |             |
|---------|----------------------|---------------------------|-----------|-----------|-------------|
| PLA2G16 | ENSG00000176485.11_3 | chr11:63340667-63384355   | 1.2526898 | 0.0395807 | 0.999912394 |
| NDE1    | ENSG00000072864.14_3 | chr16:15737124-15820210   | 1.2505641 | 0.0420034 | 0.999912394 |
| SF3A2   | ENSG00000104897.9_4  | chr19:2236503-2248678     | 1.2494376 | 0.013301  | 0.999912394 |
| IL17RA  | ENSG00000177663.13_2 | chr22:17565844-17596584   | 1.2487521 | 0.0225229 | 0.999912394 |
| TOR4A   | ENSG00000198113.2_2  | chr9:140172201-140177093  | 1.2480499 | 0.0192268 | 0.999912394 |
| FAM228A | ENSG00000186453.12_4 | chr2:24397938-24423718    | 1.2479403 | 0.0174632 | 0.999912394 |
| ADRA2B  | ENSG00000274286.1_2  | chr2:96778623-96781984    | 1.2478672 | 0.0273155 | 0.999912394 |
| H1FX    | ENSG00000184897.5_2  | chr3:129033614-129035120  | 1.2478233 | 0.0110975 | 0.999912394 |
| WTAP    | ENSG00000146457.14_2 | chr6:160146617-160177351  | 1.2474898 | 0.0412624 | 0.999912394 |
| TRAFD1  | ENSG00000135148.11_3 | chr12:112563305-112591413 | 1.2458801 | 0.0146729 | 0.999912394 |
| FAM107B | ENSG00000065809.13_3 | chr10:14560556-14816896   | 1.2447128 | 0.0191543 | 0.999912394 |
| CCNG1   | ENSG00000113328.18_2 | chr5:162864575-162873157  | 1.2428177 | 0.0178573 | 0.999912394 |
| CPVL    | ENSG00000106066.14_3 | chr7:29034847-29235067    | 1.2419374 | 0.0382903 | 0.999912394 |
| FYB1    | ENSG00000082074.15_4 | chr5:39105338-39274630    | 1.2391096 | 0.0303154 | 0.999912394 |
| PSENNEN | ENSG00000205155.7_3  | chr19:36236015-36238420   | 1.2386774 | 0.0445087 | 0.999912394 |
| MIIP    | ENSG00000116691.10_2 | chr1:12079523-12092102    | 1.2380441 | 0.0292537 | 0.999912394 |
| PARVG   | ENSG00000138964.16_3 | chr22:44568836-44615413   | 1.2379095 | 0.0213258 | 0.999912394 |
| CSF3R   | ENSG00000119535.17_3 | chr1:36931644-36948879    | 1.237778  | 0.0238275 | 0.999912394 |
| APH1A   | ENSG00000117362.12_3 | chr1:150237799-150241980  | 1.2367637 | 0.0093605 | 0.999912394 |
| CDH19   | ENSG00000071991.8_2  | chr18:64168320-64271375   | 1.2355281 | 0.03839   | 0.999912394 |
| LIPT2   | ENSG00000175536.6_2  | chr11:74202757-74204778   | 1.2346426 | 0.0380753 | 0.999912394 |
| TAB2    | ENSG00000055208.18_3 | chr6:149539777-149732749  | 1.234626  | 0.0303709 | 0.999912394 |
| PALM3   | ENSG00000187867.8_2  | chr19:14164177-14169971   | 1.2323999 | 0.0250486 | 0.999912394 |
| TRIM62  | ENSG00000116525.13_2 | chr1:33611003-33647660    | 1.2310591 | 0.0237846 | 0.999912394 |
| ZNF821  | ENSG00000102984.14_3 | chr16:71893583-71929239   | 1.2299161 | 0.0487599 | 0.999912394 |
| MED30   | ENSG00000164758.7_2  | chr8:118532952-118552501  | 1.2291014 | 0.0479023 | 0.999912394 |
| MTSS1   | ENSG00000170873.18_3 | chr8:125563031-125740670  | 1.2281944 | 0.0312497 | 0.999912394 |
| CHD2    | ENSG00000173575.20_1 | chr15:93443419-93571235   | 1.2274986 | 0.0455669 | 0.999912394 |
| HNRNPF  | ENSG00000169813.16_3 | chr10:43881065-43904614   | 1.227477  | 0.0416568 | 0.999912394 |
| MYD88   | ENSG00000172936.12_3 | chr3:38179969-38184513    | 1.2266494 | 0.0430256 | 0.999912394 |
| COL9A2  | ENSG00000049089.13_3 | chr1:40766159-40783488    | 1.2255108 | 0.0403993 | 0.999912394 |
| EMILIN2 | ENSG00000132205.10_2 | chr18:2847028-2915991     | 1.2252446 | 0.0092872 | 0.999912394 |
| RGL2    | ENSG00000237441.9_2  | chr6:33259431-33267101    | 1.2247001 | 0.0106655 | 0.999912394 |
| TCF12   | ENSG00000140262.17_2 | chr15:57210821-57591479   | 1.2246067 | 0.0305264 | 0.999912394 |
| MCM5    | ENSG00000100297.15_3 | chr22:35796056-35821423   | 1.2226446 | 0.0233467 | 0.999912394 |

|            |                      |                          |           |           |             |
|------------|----------------------|--------------------------|-----------|-----------|-------------|
| PHC2       | ENSG00000134686.18_3 | chr1:33789224-33896653   | 1.2205689 | 0.0040414 | 0.999912394 |
| FAM114A1   | ENSG00000197712.11_2 | chr4:38869298-38947360   | 1.2204702 | 0.0271639 | 0.999912394 |
| TBXAS1     | ENSG00000059377.16_2 | chr7:139476850-139720125 | 1.2176727 | 0.0345651 | 0.999912394 |
| ZNF570     | ENSG00000171827.10_2 | chr19:37958487-37979554  | 1.2173453 | 0.0226402 | 0.999912394 |
| GDE1       | ENSG0000006007.11_2  | chr16:19513011-19533467  | 1.2167078 | 0.0278638 | 0.999912394 |
| BMP8B      | ENSG00000116985.11_3 | chr1:40222854-40254533   | 1.2160911 | 0.0294302 | 0.999912394 |
| SLC4A2     | ENSG00000164889.13_3 | chr7:150754297-150773614 | 1.2135736 | 0.0302291 | 0.999912394 |
| RPS6KA2    | ENSG00000071242.11_3 | chr6:166822852-167319939 | 1.2109142 | 0.0109757 | 0.999912394 |
| EIF3F      | ENSG00000175390.13_3 | chr11:7991798-8023409    | 1.2101928 | 0.0264594 | 0.999912394 |
| FOXO3      | ENSG00000118689.14_2 | chr6:108881038-109005977 | 1.2096335 | 0.0474803 | 0.999912394 |
| FBXL8      | ENSG00000135722.8_3  | chr16:67193834-67198473  | 1.2068191 | 0.0183952 | 0.999912394 |
| ZNF217     | ENSG00000171940.13_3 | chr20:52183604-52226446  | 1.2067404 | 0.0063415 | 0.999912394 |
| JOSD2      | ENSG00000161677.11_3 | chr19:51009255-51014610  | 1.2047893 | 0.0127898 | 0.999912394 |
| RUNX1      | ENSG00000159216.18_3 | chr21:36160098-37376965  | 1.2047371 | 0.0247299 | 0.999912394 |
| LACTB2     | ENSG00000147592.8_2  | chr8:71547553-71581409   | 1.1988347 | 0.0271241 | 0.999912394 |
| BMF        | ENSG00000104081.13_3 | chr15:40380091-40401093  | 1.1977482 | 0.0485777 | 0.999912394 |
| PPP1R35    | ENSG00000160813.6_2  | chr7:100032905-100034188 | 1.1957616 | 0.0338099 | 0.999912394 |
| ZEB2       | ENSG00000169554.18_3 | chr2:145121931-145282150 | 1.1954504 | 0.0353838 | 0.999912394 |
| AC018755.1 | ENSG00000167765.3    | chr19:52095036-52097630  | 1.19383   | 0.0488274 | 0.999912394 |
| TUT1       | ENSG00000149016.15_3 | chr11:62342517-62359649  | 1.1934012 | 0.0438199 | 0.999912394 |
| MED25      | ENSG00000104973.16_3 | chr19:50321536-50342073  | 1.1892178 | 0.022476  | 0.999912394 |
| TMEM187    | ENSG00000177854.7_3  | chrX:153237778-153248646 | 1.1887293 | 0.0487107 | 0.999912394 |
| DISC1      | ENSG00000162946.21_4 | chr1:231762561-232177018 | 1.1857924 | 0.0110872 | 0.999912394 |
| NRBP2      | ENSG00000185189.17_3 | chr8:144915764-144923146 | 1.1838847 | 0.0368363 | 0.999912394 |
| FNBP1      | ENSG00000187239.16_2 | chr9:132649466-132805473 | 1.1837077 | 0.0282587 | 0.999912394 |
| STAT5A     | ENSG00000126561.16_2 | chr17:40439565-40463961  | 1.180101  | 0.0371641 | 0.999912394 |
| TIFA       | ENSG00000145365.10_2 | chr4:113195698-113207059 | 1.178567  | 0.0376155 | 0.999912394 |
| SELENOM    | ENSG00000198832.10_2 | chr22:31500758-31516055  | 1.1785199 | 0.0434439 | 0.999912394 |
| ARL16      | ENSG00000214087.8_3  | chr17:79648204-79650954  | 1.177453  | 0.03142   | 0.999912394 |
| GTPBP1     | ENSG00000100226.15_3 | chr22:39101728-39134304  | 1.1753528 | 0.0135741 | 0.999912394 |
| HAUS4      | ENSG00000092036.18_4 | chr14:23415437-23426370  | 1.1747808 | 0.0072245 | 0.999912394 |
| ARHGAP27   | ENSG00000159314.11_3 | chr17:43471268-43511787  | 1.1734611 | 0.0469769 | 0.999912394 |
| GXYLT2     | ENSG00000172986.12_3 | chr3:72937224-73047289   | 1.1708746 | 0.0223666 | 0.999912394 |
| MACROD1    | ENSG00000133315.10_3 | chr11:63766030-63933578  | 1.1696237 | 0.0475393 | 0.999912394 |
| SMPDL3A    | ENSG00000172594.12_2 | chr6:123110194-123130865 | 1.1692425 | 0.0446456 | 0.999912394 |

|                             |                      |                          |           |           |             |
|-----------------------------|----------------------|--------------------------|-----------|-----------|-------------|
| BLVRB                       | ENSG00000090013.9_2  | chr19:40953696-40971747  | 1.1641493 | 0.0294404 | 0.999912394 |
| RCAN1                       | ENSG00000159200.17_2 | chr21:35885440-35987441  | 1.1594898 | 0.0339671 | 0.999912394 |
| SNIP1                       | ENSG00000163877.10_2 | chr1:38000050-38019945   | 1.1587107 | 0.0407049 | 0.999912394 |
| GTF2F2                      | ENSG00000188342.11_3 | chr13:45694650-45859044  | 1.1553077 | 0.0138344 | 0.999912394 |
| KCTD5                       | ENSG00000167977.8_3  | chr16:2732476-2759031    | 1.1511217 | 0.0410237 | 0.999912394 |
| LSM1                        | ENSG00000175324.9_2  | chr8:38020839-38034248   | 1.147908  | 0.0453231 | 0.999912394 |
| LLGL2                       | ENSG00000073350.13_2 | chr17:73521161-73571289  | 1.1455037 | 0.0497083 | 0.999912394 |
| KRBA2                       | ENSG00000184619.3_3  | chr17:8271955-8280029    | 1.1452456 | 0.0460014 | 0.999912394 |
| BAZ2A                       | ENSG00000076108.11_2 | chr12:56989380-57030600  | 1.1441418 | 0.0482752 | 0.999912394 |
| CDK19                       | ENSG00000155111.14_3 | chr6:110931181-111137161 | 1.142423  | 0.0318343 | 0.999912394 |
| WHAMM                       | ENSG00000156232.7_2  | chr15:83478380-83504860  | 1.1388265 | 0.0204501 | 0.999912394 |
| TBC1D1                      | ENSG00000065882.15_3 | chr4:37892708-38140796   | 1.1370191 | 0.0418677 | 0.999912394 |
| TCEAL3                      | ENSG00000196507.10_3 | chrX:102862379-102884618 | 1.1365208 | 0.0453117 | 0.999912394 |
| RIN3                        | ENSG00000100599.15_4 | chr14:92980118-93155339  | 1.1312604 | 0.044281  | 0.999912394 |
| RALY                        | ENSG00000125970.11_4 | chr20:32581452-32696114  | 1.127119  | 0.0485894 | 0.999912394 |
| CC2D1A                      | ENSG00000132024.17_3 | chr19:14017014-14041692  | 1.1255187 | 0.0372756 | 0.999912394 |
| UBE2D2                      | ENSG00000131508.15_2 | chr5:138906016-139008018 | 1.125508  | 0.0484474 | 0.999912394 |
| C14orf93                    | ENSG00000100802.14_3 | chr14:23455117-23479375  | 1.1185911 | 0.0385821 | 0.999912394 |
| PHF11                       | ENSG00000136147.17_4 | chr13:50069746-50103123  | 1.1184468 | 0.0259917 | 0.999912394 |
| CCDC9                       | ENSG00000105321.12_2 | chr19:47759237-47775210  | 1.1153723 | 0.0415504 | 0.999912394 |
| SPAG1                       | ENSG00000104450.12_2 | chr8:101170134-101271506 | 1.1132633 | 0.0342163 | 0.999912394 |
| KLHL36                      | ENSG00000135686.12_2 | chr16:84682131-84701292  | 1.0996935 | 0.0386563 | 0.999912394 |
| ATXN1L                      | ENSG00000224470.7_3  | chr16:71879894-71919171  | 1.0728368 | 0.0473205 | 0.999912394 |
| <b>Down-regulated genes</b> |                      |                          |           |           |             |
| RNASEH2B                    | ENSG00000136104.19_3 | chr13:51483814-51547881  | 0.9263577 | 0.0496634 | 0.999912394 |
| DNAJC24                     | ENSG00000170946.14_2 | chr11:31391387-31453396  | 0.9192889 | 0.0274706 | 0.999912394 |
| AP3S2                       | ENSG00000157823.16_3 | chr15:90373831-90437870  | 0.9112092 | 0.0498719 | 0.999912394 |
| TET1                        | ENSG00000138336.8_3  | chr10:70320413-70454239  | 0.9024881 | 0.0076316 | 0.999912394 |
| ZSCAN29                     | ENSG00000140265.12_2 | chr15:43650370-43663223  | 0.8990058 | 0.046785  | 0.999912394 |
| ZNF713                      | ENSG00000178665.14_3 | chr7:55955168-56009918   | 0.8873668 | 0.0164467 | 0.999912394 |
| PDE7B                       | ENSG00000171408.13_3 | chr6:136172834-136516712 | 0.8871713 | 0.0490762 | 0.999912394 |
| ZFP3                        | ENSG00000180787.5_2  | chr17:4981543-4999669    | 0.8855522 | 0.0246304 | 0.999912394 |
| ISPD                        | ENSG00000214960.9_2  | chr7:16127152-16460947   | 0.8830823 | 0.0429459 | 0.999912394 |
| ASAP2                       | ENSG00000151693.10_3 | chr2:9346894-9545812     | 0.8790239 | 0.0426633 | 0.999912394 |
| LZIC                        | ENSG00000162441.11_2 | chr1:9982171-10003465    | 0.8785773 | 0.0350735 | 0.999912394 |

|            |                      |                           |           |           |             |
|------------|----------------------|---------------------------|-----------|-----------|-------------|
| KMT5B      | ENSG00000110066.14_3 | chr11:67922330-67981295   | 0.8762556 | 0.0410923 | 0.999912394 |
| LYRM2      | ENSG00000083099.10_2 | chr6:90277863-90348472    | 0.8757792 | 0.0216332 | 0.999912394 |
| SGSM3      | ENSG00000100359.20_3 | chr22:40766595-40806293   | 0.874915  | 0.0405052 | 0.999912394 |
| GIN1       | ENSG00000145723.16_2 | chr5:102421704-102455855  | 0.8702349 | 0.0176353 | 0.999912394 |
| CDIP1      | ENSG00000089486.16_3 | chr16:4560676-4588829     | 0.8639487 | 0.0192545 | 0.999912394 |
| MARC1      | ENSG00000186205.12_3 | chr1:220960101-220992999  | 0.863248  | 0.0133391 | 0.999912394 |
| RNF214     | ENSG00000167257.10_3 | chr11:117103341-117157161 | 0.8631369 | 0.0106245 | 0.999912394 |
| PCDHB7     | ENSG00000113212.6_2  | chr5:140552200-140555964  | 0.8596802 | 0.0464523 | 0.999912394 |
| TRAPPC5    | ENSG00000181029.8_3  | chr19:7745729-7752589     | 0.8586476 | 0.0372299 | 0.999912394 |
| SYPL2      | ENSG00000143028.8_2  | chr1:110009250-110024759  | 0.8583532 | 0.0025033 | 0.999912394 |
| GSTM2      | ENSG00000213366.12_3 | chr1:110210644-110252173  | 0.8556602 | 0.0315312 | 0.999912394 |
| THSD1      | ENSG00000136114.15_2 | chr13:52951302-52980629   | 0.845616  | 0.0217433 | 0.999912394 |
| SGCD       | ENSG00000170624.13_2 | chr5:155297354-156194799  | 0.8447133 | 0.0351057 | 0.999912394 |
| PLCB3      | ENSG00000149782.11_2 | chr11:64018995-64036622   | 0.8445156 | 0.0303356 | 0.999912394 |
| SEL1L3     | ENSG00000091490.10_3 | chr4:25749049-25865382    | 0.8441025 | 0.0024603 | 0.999912394 |
| SLC35A4    | ENSG00000176087.14_2 | chr5:139944041-139948688  | 0.8382002 | 0.0421184 | 0.999912394 |
| VILL       | ENSG00000136059.14_2 | chr3:38029550-38048679    | 0.8355835 | 0.0189474 | 0.999912394 |
| SCGB3A1    | ENSG00000161055.3_2  | chr5:180017103-180018540  | 0.8351407 | 0.0489781 | 0.999912394 |
| TCERG1L    | ENSG00000176769.9_2  | chr10:132890654-133109984 | 0.8339763 | 0.0461175 | 0.999912394 |
| CLUAP1     | ENSG00000103351.12_3 | chr16:3550924-3589048     | 0.8274534 | 0.036996  | 0.999912394 |
| DPH3       | ENSG00000154813.9_2  | chr3:16299485-16306479    | 0.8206404 | 0.0066713 | 0.999912394 |
| MON1A      | ENSG00000164077.13_4 | chr3:49946295-49967606    | 0.8193118 | 0.0366616 | 0.999912394 |
| CACHD1     | ENSG00000158966.13_2 | chr1:64936475-65158741    | 0.8180571 | 0.0310342 | 0.999912394 |
| NT5E       | ENSG00000135318.11_3 | chr6:86159302-86205509    | 0.8171443 | 0.018534  | 0.999912394 |
| TRPM3      | ENSG00000083067.22_3 | chr9:73143979-74061820    | 0.8157727 | 0.0352362 | 0.999912394 |
| SHROOM2    | ENSG00000146950.12_2 | chrX:9754496-9917483      | 0.8083461 | 0.0260327 | 0.999912394 |
| ADHFE1     | ENSG00000147576.15_3 | chr8:67342420-67383836    | 0.8032816 | 0.0306443 | 0.999912394 |
| AC091167.7 | ENSG00000275674.1_4  | chr15:90809549-90857731   | 0.801337  | 0.0433393 | 0.999912394 |
| SPATA24    | ENSG00000170469.10_4 | chr5:138732252-138739777  | 0.7986994 | 0.0050226 | 0.999912394 |
| CDH4       | ENSG00000179242.15_4 | chr20:59827482-60515673   | 0.7962247 | 0.019576  | 0.999912394 |
| CLDN10     | ENSG00000134873.9_2  | chr13:96085858-96232013   | 0.7947775 | 0.0254516 | 0.999912394 |
| N6AMT1     | ENSG00000156239.11_2 | chr21:30244513-30257693   | 0.794196  | 0.0192057 | 0.999912394 |
| FUT9       | ENSG00000172461.10_2 | chr6:96463860-96663488    | 0.7924129 | 0.0261338 | 0.999912394 |
| FZD8       | ENSG00000177283.7_3  | chr10:35927177-35931206   | 0.7911683 | 0.0373176 | 0.999912394 |
| MTA3       | ENSG00000057935.13_2 | chr2:42721709-42984087    | 0.7883872 | 0.0229091 | 0.999912394 |



|          |                      |                          |           |           |             |
|----------|----------------------|--------------------------|-----------|-----------|-------------|
| CISD3    | ENSG00000277972.1_2  | chr17:36886488-36891297  | 0.7833351 | 0.0087768 | 0.999912394 |
| WNT7B    | ENSG00000188064.9_3  | chr22:46316242-46373009  | 0.7770486 | 0.0398209 | 0.999912394 |
| MRPL34   | ENSG00000130312.6_3  | chr19:17403418-17417652  | 0.7698633 | 0.0371592 | 0.999912394 |
| ASPDH    | ENSG00000204653.9_3  | chr19:51014857-51017947  | 0.7658521 | 0.0327412 | 0.999912394 |
| TTPA     | ENSG00000137561.4_2  | chr8:63961112-63998612   | 0.7616707 | 0.0046591 | 0.999912394 |
| LFNG     | ENSG00000106003.12_2 | chr7:2552163-2568811     | 0.7578215 | 0.0298689 | 0.999912394 |
| KCNJ14   | ENSG00000182324.6_3  | chr19:48958766-48970237  | 0.7523269 | 0.0071809 | 0.999912394 |
| CHST7    | ENSG00000147119.3_2  | chrX:46433219-46457843   | 0.7443651 | 0.0226256 | 0.999912394 |
| CYB561D1 | ENSG00000174151.14_4 | chr1:110036674-110045554 | 0.7427098 | 0.0254082 | 0.999912394 |
| TEN1     | ENSG00000257949.6_3  | chr17:73975301-73996667  | 0.7386488 | 0.0370837 | 0.999912394 |
| CHP1     | ENSG00000187446.11_2 | chr15:41523037-41574088  | 0.7310931 | 0.0382482 | 0.999912394 |
| ARNT2    | ENSG00000172379.20_3 | chr15:80696692-80890278  | 0.7235799 | 0.0358096 | 0.999912394 |
| ACSS1    | ENSG00000154930.14_2 | chr20:24986866-25039616  | 0.7132899 | 0.0013848 | 0.999912394 |
| HES5     | ENSG00000197921.5_2  | chr1:2460184-2461684     | 0.5447051 | 0.0328057 | 0.999912394 |

**Table S5. Gene Ontology analysis performed with up-regulated genes (> 1.3-fold) in synaptic fraction**

| GO ID                          | Term annotated                                                      | Number of genes | Fold enrichment | p-value  | FDR      |
|--------------------------------|---------------------------------------------------------------------|-----------------|-----------------|----------|----------|
| <b>Biological Process (BP)</b> |                                                                     |                 |                 |          |          |
| GO:0110089                     | Regulation of hippocampal neuron apoptotic process                  | 2               | 99.98           | 3.63E-04 | 4.29E-02 |
| GO:0071223                     | Cellular response to lipoteichoic acid                              | 3               | 59.99           | 3.30E-05 | 9.85E-03 |
| GO:0070391                     | Response to lipoteichoic acid                                       | 3               | 59.99           | 3.30E-05 | 9.67E-03 |
| GO:0002523                     | Leukocyte migration involved in inflammatory response               | 3               | 46.15           | 6.40E-05 | 1.51E-02 |
| GO:0002269                     | Leukocyte activation involved in inflammatory response              | 4               | 36.36           | 7.95E-06 | 4.84E-03 |
| GO:0001774                     | Microglial cell activation                                          | 4               | 36.36           | 7.95E-06 | 4.66E-03 |
| GO:0007250                     | Activation of NF-kappaB-inducing kinase activity                    | 3               | 33.33           | 1.49E-04 | 2.29E-02 |
| GO:1903978                     | Regulation of microglial cell activation                            | 3               | 29.99           | 1.97E-04 | 2.78E-02 |
| GO:0010894                     | Negative regulation of steroid biosynthetic process                 | 3               | 26.08           | 2.86E-04 | 3.71E-02 |
| GO:0061900                     | Glial cell activation                                               | 4               | 25.8            | 2.69E-05 | 8.35E-03 |
| GO:0042116                     | Macrophage activation                                               | 5               | 24.39           | 3.23E-06 | 2.43E-03 |
| GO:0150076                     | Neuroinflammatory response                                          | 4               | 24.24           | 3.37E-05 | 9.51E-03 |
| GO:0045939                     | Negative regulation of steroid metabolic process                    | 3               | 24              | 3.58E-04 | 4.26E-02 |
| GO:1901224                     | Positive regulation of NIK/NF-kappaB signaling                      | 5               | 13.16           | 5.26E-05 | 1.34E-02 |
| GO:0030593                     | Neutrophil chemotaxis                                               | 5               | 12.19           | 7.41E-05 | 1.65E-02 |
| GO:0071621                     | Granulocyte chemotaxis                                              | 5               | 11.23           | 1.07E-04 | 1.92E-02 |
| GO:1901222                     | Regulation of NIK/NF-kappaB signaling                               | 6               | 11.21           | 2.16E-05 | 7.11E-03 |
| GO:1990266                     | Neutrophil migration                                                | 5               | 10.99           | 1.18E-04 | 2.03E-02 |
| GO:0097530                     | Granulocyte migration                                               | 5               | 10.1            | 1.72E-04 | 2.60E-02 |
| GO:0042035                     | Regulation of cytokine biosynthetic process                         | 5               | 9.9             | 1.89E-04 | 2.74E-02 |
| GO:0032680                     | Regulation of tumor necrosis factor production                      | 6               | 8.82            | 7.78E-05 | 1.71E-02 |
| GO:1903555                     | Regulation of tumor necrosis factor superfamily cytokine production | 6               | 8.57            | 9.07E-05 | 1.86E-02 |
| GO:0030595                     | Leukocyte chemotaxis                                                | 6               | 8.51            | 9.42E-05 | 1.86E-02 |
| GO:0002221                     | Pattern recognition receptor signaling pathway                      | 5               | 8.13            | 4.52E-04 | 4.83E-02 |
| GO:0097529                     | Myeloid leukocyte migration                                         | 5               | 8.06            | 4.68E-04 | 4.93E-02 |
| GO:0051092                     | Positive regulation of NF-kappaB transcription factor activity      | 6               | 7.89            | 1.40E-04 | 2.24E-02 |
| GO:0030099                     | Myeloid cell differentiation                                        | 8               | 7.58            | 1.39E-05 | 5.80E-03 |
| GO:0071219                     | Cellular response to molecule of bacterial origin                   | 7               | 7.29            | 6.23E-05 | 1.52E-02 |
| GO:0060326                     | Cell chemotaxis                                                     | 7               | 6.83            | 9.26E-05 | 1.88E-02 |
| GO:0034341                     | Response to interferon-gamma                                        | 6               | 6.59            | 3.58E-04 | 4.29E-02 |

|            |                                                                  |    |      |          |          |
|------------|------------------------------------------------------------------|----|------|----------|----------|
| GO:0071216 | Cellular response to biotic stimulus                             | 7  | 6.54 | 1.20E-04 | 2.04E-02 |
| GO:0071222 | Cellular response to lipopolysaccharide                          | 6  | 6.49 | 3.89E-04 | 4.46E-02 |
| GO:0051091 | Positive regulation of DNA-binding transcription factor activity | 8  | 6.04 | 6.69E-05 | 1.56E-02 |
| GO:0032496 | Response to lipopolysaccharide                                   | 9  | 5.75 | 3.34E-05 | 9.60E-03 |
| GO:0002237 | Response to molecule of bacterial origin                         | 9  | 5.5  | 4.65E-05 | 1.21E-02 |
| GO:0043312 | Neutrophil degranulation                                         | 13 | 5.38 | 1.11E-06 | 2.52E-03 |
| GO:0002283 | Neutrophil activation involved in immune response                | 13 | 5.34 | 1.22E-06 | 2.41E-03 |
| GO:0002446 | Neutrophil mediated immunity                                     | 13 | 5.26 | 1.42E-06 | 2.25E-03 |
| GO:0110053 | Regulation of actin filament organization                        | 7  | 5.26 | 4.35E-04 | 4.74E-02 |
| GO:0042119 | Neutrophil activation                                            | 13 | 5.24 | 1.49E-06 | 2.14E-03 |
| GO:0002274 | Myeloid leukocyte activation                                     | 15 | 5.23 | 2.19E-07 | 1.73E-03 |
| GO:0036230 | Granulocyte activation                                           | 13 | 5.19 | 1.65E-06 | 2.18E-03 |
| GO:0032970 | Regulation of actin filament-based process                       | 10 | 5.18 | 2.86E-05 | 8.70E-03 |
| GO:0043299 | Leukocyte degranulation                                          | 13 | 5.15 | 1.80E-06 | 2.04E-03 |
| GO:0002444 | Myeloid leukocyte mediated immunity                              | 13 | 5.05 | 2.22E-06 | 2.20E-03 |
| GO:0002275 | Myeloid cell activation involved in immune response              | 13 | 5.02 | 2.37E-06 | 2.08E-03 |
| GO:0006954 | Inflammatory response                                            | 12 | 4.95 | 6.85E-06 | 4.51E-03 |
| GO:0050727 | Regulation of inflammatory response                              | 8  | 4.86 | 2.83E-04 | 3.70E-02 |
| GO:0032956 | Regulation of actin cytoskeleton organization                    | 8  | 4.66 | 3.72E-04 | 4.36E-02 |
| GO:1902903 | Regulation of supramolecular fiber organization                  | 8  | 4.51 | 4.65E-04 | 4.93E-02 |
| GO:2001233 | Regulation of apoptotic signaling pathway                        | 9  | 4.49 | 2.10E-04 | 2.91E-02 |
| GO:0002366 | Leukocyte activation involved in immune response                 | 13 | 4.23 | 1.42E-05 | 5.75E-03 |
| GO:0051090 | Regulation of DNA-binding transcription factor activity          | 9  | 4.21 | 3.30E-04 | 3.98E-02 |
| GO:0002263 | Cell activation involved in immune response                      | 13 | 4.21 | 1.52E-05 | 5.99E-03 |
| GO:0045055 | Regulated exocytosis                                             | 14 | 4.03 | 1.10E-05 | 5.28E-03 |
| GO:0002757 | Immune response-activating signal transduction                   | 11 | 4    | 1.11E-04 | 1.93E-02 |
| GO:0002443 | Leukocyte mediated immunity                                      | 15 | 3.95 | 6.71E-06 | 4.61E-03 |
| GO:0009611 | Response to wounding                                             | 11 | 3.91 | 1.36E-04 | 2.21E-02 |
| GO:0002253 | Activation of immune response                                    | 12 | 3.88 | 7.12E-05 | 1.61E-02 |
| GO:0044089 | Positive regulation of cellular component biogenesis             | 10 | 3.87 | 3.00E-04 | 3.82E-02 |
| GO:0071396 | Cellular response to lipid                                       | 10 | 3.82 | 3.28E-04 | 4.02E-02 |
| GO:0002764 | Immune response-regulating signaling pathway                     | 11 | 3.75 | 1.94E-04 | 2.78E-02 |
| GO:0002252 | Immune effector process                                          | 20 | 3.73 | 3.79E-07 | 1.50E-03 |
| GO:0051493 | Regulation of cytoskeleton organization                          | 10 | 3.72 | 4.02E-04 | 4.51E-02 |
| GO:0051347 | Positive regulation of transferase activity                      | 12 | 3.7  | 1.10E-04 | 1.94E-02 |

|            |                                                                         |    |      |          |          |
|------------|-------------------------------------------------------------------------|----|------|----------|----------|
| GO:0006887 | Exocytosis                                                              | 14 | 3.58 | 4.02E-05 | 1.09E-02 |
| GO:0045321 | Leukocyte activation                                                    | 16 | 3.55 | 1.20E-05 | 5.57E-03 |
| GO:0006915 | Apoptotic process                                                       | 16 | 3.53 | 1.28E-05 | 5.62E-03 |
| GO:0001817 | Regulation of cytokine production                                       | 12 | 3.5  | 1.81E-04 | 2.67E-02 |
| GO:0002682 | Regulation of immune system process                                     | 28 | 3.44 | 5.88E-09 | 9.30E-05 |
| GO:0001775 | Cell activation                                                         | 17 | 3.24 | 1.93E-05 | 6.95E-03 |
| GO:0050776 | Regulation of immune response                                           | 18 | 3.21 | 1.25E-05 | 5.64E-03 |
| GO:0045087 | Innate immune response                                                  | 12 | 3.19 | 4.17E-04 | 4.61E-02 |
| GO:1902533 | Positive regulation of intracellular signal transduction                | 16 | 3.18 | 4.42E-05 | 1.16E-02 |
| GO:0030334 | Regulation of cell migration                                            | 13 | 3.14 | 2.73E-04 | 3.60E-02 |
| GO:0000122 | Negative regulation of transcription by RNA polymerase II               | 13 | 3.11 | 3.02E-04 | 3.82E-02 |
| GO:0051270 | Regulation of cellular component movement                               | 15 | 3.1  | 1.05E-04 | 1.92E-02 |
| GO:0051338 | Regulation of transferase activity                                      | 15 | 3.09 | 1.08E-04 | 1.92E-02 |
| GO:0050778 | Positive regulation of immune response                                  | 13 | 3.08 | 3.27E-04 | 4.04E-02 |
| GO:0012501 | Programmed cell death                                                   | 16 | 3.08 | 6.37E-05 | 1.53E-02 |
| GO:0033993 | Response to lipid                                                       | 13 | 3.03 | 3.82E-04 | 4.44E-02 |
| GO:0016477 | Cell migration                                                          | 14 | 2.99 | 2.56E-04 | 3.40E-02 |
| GO:0008219 | Cell death                                                              | 16 | 2.98 | 9.34E-05 | 1.87E-02 |
| GO:0034097 | Response to cytokine                                                    | 16 | 2.97 | 9.85E-05 | 1.85E-02 |
| GO:0033043 | Regulation of organelle organization                                    | 19 | 2.97 | 2.02E-05 | 6.96E-03 |
| GO:0051707 | Response to other organism                                              | 14 | 2.93 | 3.23E-04 | 4.02E-02 |
| GO:0043207 | Response to external biotic stimulus                                    | 14 | 2.92 | 3.29E-04 | 4.01E-02 |
| GO:0051130 | Positive regulation of cellular component organization                  | 17 | 2.85 | 9.43E-05 | 1.84E-02 |
| GO:0009607 | Response to biotic stimulus                                             | 14 | 2.84 | 4.29E-04 | 4.71E-02 |
| GO:0002684 | Positive regulation of immune system process                            | 16 | 2.83 | 1.68E-04 | 2.56E-02 |
| GO:0032940 | Secretion by cell                                                       | 14 | 2.83 | 4.47E-04 | 4.84E-02 |
| GO:0071345 | Cellular response to cytokine stimulus                                  | 14 | 2.83 | 4.51E-04 | 4.85E-02 |
| GO:0044093 | Positive regulation of molecular function                               | 25 | 2.83 | 1.78E-06 | 2.16E-03 |
| GO:0031327 | Negative regulation of cellular biosynthetic process                    | 21 | 2.81 | 1.58E-05 | 6.11E-03 |
| GO:0009890 | Negative regulation of biosynthetic process                             | 21 | 2.76 | 2.00E-05 | 7.04E-03 |
| GO:0051253 | Negative regulation of RNA metabolic process                            | 18 | 2.75 | 9.06E-05 | 1.88E-02 |
| GO:0045892 | Negative regulation of transcription, DNA-templated                     | 16 | 2.75 | 2.37E-04 | 3.22E-02 |
| GO:0006952 | Defense response                                                        | 18 | 2.73 | 1.01E-04 | 1.85E-02 |
| GO:0045934 | Negative regulation of nucleobase-containing compound metabolic process | 19 | 2.7  | 7.06E-05 | 1.62E-02 |

|            |                                                                    |    |      |          |          |
|------------|--------------------------------------------------------------------|----|------|----------|----------|
| GO:0043085 | Positive regulation of catalytic activity                          | 19 | 2.68 | 7.97E-05 | 1.73E-02 |
| GO:1902531 | Regulation of intracellular signal transduction                    | 24 | 2.65 | 9.08E-06 | 4.79E-03 |
| GO:2000113 | Negative regulation of cellular macromolecule biosynthetic process | 18 | 2.64 | 1.48E-04 | 2.30E-02 |
| GO:0010558 | Negative regulation of macromolecule biosynthetic process          | 19 | 2.63 | 1.00E-04 | 1.86E-02 |
| GO:1903507 | Negative regulation of nucleic acid-templated transcription        | 16 | 2.63 | 3.86E-04 | 4.45E-02 |
| GO:1902679 | Negative regulation of RNA biosynthetic process                    | 16 | 2.62 | 3.93E-04 | 4.47E-02 |
| GO:0051240 | Positive regulation of multicellular organismal process            | 22 | 2.56 | 3.91E-05 | 1.08E-02 |
| GO:0051128 | Regulation of cellular component organization                      | 31 | 2.54 | 7.11E-07 | 1.87E-03 |
| GO:0001932 | Regulation of protein phosphorylation                              | 18 | 2.54 | 2.45E-04 | 3.31E-02 |
| GO:0010941 | Regulation of cell death                                           | 21 | 2.5  | 8.19E-05 | 1.75E-02 |
| GO:1901700 | Response to oxygen-containing compound                             | 19 | 2.5  | 1.95E-04 | 2.78E-02 |
| GO:0009967 | Positive regulation of signal transduction                         | 20 | 2.44 | 1.73E-04 | 2.58E-02 |
| GO:0002376 | Immune system process                                              | 33 | 2.41 | 1.25E-06 | 2.20E-03 |
| GO:0006955 | Immune response                                                    | 22 | 2.41 | 9.50E-05 | 1.83E-02 |
| GO:0007166 | Cell surface receptor signaling pathway                            | 29 | 2.38 | 8.83E-06 | 4.81E-03 |
| GO:0010628 | Positive regulation of gene expression                             | 23 | 2.34 | 1.26E-04 | 2.10E-02 |
| GO:0045595 | Regulation of cell differentiation                                 | 21 | 2.34 | 2.87E-04 | 3.69E-02 |
| GO:0048584 | Positive regulation of response to stimulus                        | 28 | 2.33 | 1.69E-05 | 6.38E-03 |
| GO:0031399 | Regulation of protein modification process                         | 21 | 2.32 | 3.06E-04 | 3.84E-02 |
| GO:0031324 | Negative regulation of cellular metabolic process                  | 29 | 2.31 | 1.28E-05 | 5.49E-03 |
| GO:0009605 | Response to external stimulus                                      | 24 | 2.31 | 9.67E-05 | 1.84E-02 |
| GO:0051172 | Negative regulation of nitrogen compound metabolic process         | 26 | 2.26 | 6.07E-05 | 1.52E-02 |
| GO:0051173 | Positive regulation of nitrogen compound metabolic process         | 35 | 2.24 | 2.78E-06 | 2.31E-03 |
| GO:0065009 | Regulation of molecular function                                   | 36 | 2.21 | 2.15E-06 | 2.27E-03 |
| GO:0031325 | Positive regulation of cellular metabolic process                  | 36 | 2.2  | 2.30E-06 | 2.14E-03 |
| GO:0050793 | Regulation of developmental process                                | 28 | 2.19 | 6.10E-05 | 1.51E-02 |
| GO:2000026 | Regulation of multicellular organismal development                 | 22 | 2.18 | 3.99E-04 | 4.51E-02 |
| GO:0050790 | Regulation of catalytic activity                                   | 25 | 2.17 | 2.18E-04 | 3.00E-02 |
| GO:0010604 | Positive regulation of macromolecule metabolic process             | 35 | 2.12 | 9.68E-06 | 4.94E-03 |
| GO:0009893 | Positive regulation of metabolic process                           | 37 | 2.07 | 6.23E-06 | 4.48E-03 |
| GO:0032879 | Regulation of localization                                         | 28 | 2.07 | 1.84E-04 | 2.69E-02 |
| GO:0051239 | Regulation of multicellular organismal process                     | 32 | 2.07 | 4.17E-05 | 1.12E-02 |
| GO:0070887 | Cellular response to chemical stimulus                             | 29 | 2.05 | 1.37E-04 | 2.22E-02 |
| GO:0048583 | Regulation of response to stimulus                                 | 45 | 2.05 | 4.18E-07 | 1.32E-03 |
| GO:0009892 | Negative regulation of metabolic process                           | 29 | 2.04 | 1.48E-04 | 2.32E-02 |

|                                |                                           |    |       |          |          |
|--------------------------------|-------------------------------------------|----|-------|----------|----------|
| GO:0009966                     | Regulation of signal transduction         | 32 | 1.95  | 1.26E-04 | 2.12E-02 |
| GO:0007165                     | Signal transduction                       | 46 | 1.85  | 8.03E-06 | 4.54E-03 |
| GO:0023051                     | Regulation of signaling                   | 34 | 1.85  | 2.47E-04 | 3.31E-02 |
| GO:0048518                     | Positive regulation of biological process | 56 | 1.84  | 2.30E-07 | 1.21E-03 |
| GO:0048522                     | Positive regulation of cellular process   | 49 | 1.83  | 2.84E-06 | 2.24E-03 |
| GO:0010646                     | Regulation of cell communication          | 33 | 1.82  | 4.07E-04 | 4.53E-02 |
| GO:0023052                     | Signaling                                 | 48 | 1.81  | 7.48E-06 | 4.73E-03 |
| GO:0048731                     | System development                        | 39 | 1.79  | 1.48E-04 | 2.33E-02 |
| GO:0007154                     | Cell communication                        | 48 | 1.78  | 9.89E-06 | 4.89E-03 |
| GO:0048523                     | Negative regulation of cellular process   | 41 | 1.76  | 1.30E-04 | 2.13E-02 |
| GO:0048519                     | Negative regulation of biological process | 46 | 1.76  | 2.30E-05 | 7.41E-03 |
| GO:0048856                     | Anatomical structure development          | 47 | 1.76  | 2.37E-05 | 7.50E-03 |
| GO:0032502                     | Developmental process                     | 49 | 1.72  | 2.15E-05 | 7.25E-03 |
| GO:0007275                     | Multicellular organism development        | 42 | 1.69  | 1.99E-04 | 2.78E-02 |
| GO:0051716                     | Cellular response to stimulus             | 54 | 1.65  | 1.92E-05 | 7.07E-03 |
| GO:0050896                     | Response to stimulus                      | 62 | 1.48  | 8.22E-05 | 1.73E-02 |
| <b>Molecular Function (MF)</b> |                                           |    |       |          |          |
| GO:0035325                     | Toll-like receptor binding                | 3  | 49.99 | 5.22E-05 | 4.85E-02 |
| GO:0019901                     | Protein kinase binding                    | 13 | 3.95  | 2.88E-05 | 4.47E-02 |
| GO:0019900                     | Kinase binding                            | 14 | 3.78  | 2.22E-05 | 5.16E-02 |
| GO:0044877                     | Protein-containing complex binding        | 17 | 3.08  | 3.70E-05 | 4.31E-02 |
| GO:0005515                     | Protein binding                           | 81 | 1.36  | 1.71E-05 | 7.94E-02 |
| <b>Cellular Component (CC)</b> |                                           |    |       |          |          |
| GO:0002102                     | Podosome                                  | 4  | 27.58 | 2.12E-05 | 2.16E-02 |
| GO:0030667                     | Secretory granule membrane                | 10 | 6.64  | 3.51E-06 | 7.14E-03 |
| <b>PANTHER pathway</b>         |                                           |    |       |          |          |
| P00054                         | Toll receptor signaling pathway           | 6  | 18.75 | 1.33E-06 | 2.18E-04 |

**Table S6. The response to stimulus, immune system process, and cell death related Gene Ontology (GO) terms of biological process based on upregulated genes (>1.3-fold) in synaptosome**

| GO ID                                         | Term annotated                                           | Fold enrichment | p-value  | FDR      | Number of genes |
|-----------------------------------------------|----------------------------------------------------------|-----------------|----------|----------|-----------------|
| <b>Response to stimulus related GO terms</b>  |                                                          |                 |          |          |                 |
| GO:0050896                                    | Response to stimulus                                     | 1.48            | 8.22E-05 | 1.73E-02 | 62              |
| GO:0006952                                    | ➤ defense response                                       | 6.66            | 1.12E-04 | 2.11E-02 | 18              |
| GO:0006954                                    | - inflammatory response                                  | 2.48            | 8.37E-06 | 4.16E-03 | 12              |
| GO:0002523                                    | - leukocyte migration involved in inflammatory response  | 46.15           | 6.40E-05 | 1.51E-02 | 3               |
| GO:0002269                                    | - leukocyte activation involved in inflammatory response | 2.48            | 7.95E-06 | 4.84E-03 | 5               |
| GO:0050727                                    | - regulation of inflammatory response                    | 4.86            | 2.83E-04 | 3.70E-02 | 8               |
| GO:0150076                                    | - neuroinflammatory response                             | 24.24           | 3.37E-05 | 9.51E-03 | 4               |
| GO:0061900                                    | - glial cell activation                                  | 25.8            | 2.69E-05 | 8.35E-03 | 4               |
| GO:0001774                                    | - microglial cell activation                             | 36.36           | 7.95E-06 | 4.66E-03 | 4               |
| GO:1903978                                    | - regulation of microglial cell activation               | 29.99           | 1.97E-04 | 2.78E-02 | 3               |
| GO:0098542                                    | - defense response to other organism                     | 4.7             | 2.70E-04 | 3.58E-02 | 14              |
| GO:0045087                                    | - innate immune response                                 | 3.19            | 4.17E-04 | 4.61E-02 | 12              |
| GO:0034341                                    | - response to interferon-gamma                           | 6.59            | 3.58E-04 | 4.29E-02 | 6               |
| GO:0009607                                    | ➤ response to biotic stimulus                            | 2.84            | 4.29E-04 | 4.71E-02 | 14              |
| GO:0043207                                    | - response to external biotic stimulus                   | 2.92            | 3.29E-04 | 4.01E-02 | 14              |
| GO:0009605                                    | ➤ response to external stimulus                          | 2.31            | 9.67E-05 | 1.84E-02 | 24              |
| GO:1901700                                    | ➤ response to oxygen-containing compound                 | 7.87            | 3.00E-04 | 3.88E-02 | 19              |
| <b>Immune system process related GO terms</b> |                                                          |                 |          |          |                 |
| GO:0002376                                    | Immune system process                                    | 2.41            | 1.25E-06 | 2.20E-03 | 33              |
| GO:0002252                                    | ➤ immune effector process                                | 3.73            | 3.79E-07 | 1.50E-03 | 20              |
| GO:0002443                                    | - leukocyte mediated immunity                            | 3.95            | 6.71E-06 | 4.61E-03 | 15              |
| GO:0002444                                    | - myeloid leukocyte mediated immunity                    | 5.34            | 1.22E-06 | 2.41E-03 | 13              |
| GO:0002446                                    | - neutrophil mediated immunity                           | 5.26            | 1.42E-06 | 2.25E-03 | 13              |
| GO:0006955                                    | ➤ immune response                                        | 2.41            | 9.50E-05 | 1.83E-02 | 22              |
| GO:0002263                                    | - cell activation involved in immune response            | 4.21            | 1.52E-05 | 5.99E-03 | 13              |
| GO:0002366                                    | - leukocyte activation involved in immune response       | 4.23            | 1.42E-05 | 5.75E-03 | 13              |
| GO:0002275                                    | - myeloid cell activation involved in immune response    | 5.02            | 2.37E-06 | 2.08E-03 | 13              |

|                                    |                                                      |       |          |          |    |
|------------------------------------|------------------------------------------------------|-------|----------|----------|----|
| GO:0002283                         | - neutrophil activation involved in immune response  | 5.34  | 1.22E-06 | 2.41E-03 | 13 |
| GO:0050776                         | - regulation of immune response                      | 3.21  | 1.25E-05 | 5.64E-03 | 18 |
| GO:0002764                         | - immune response-regulating signaling pathway       | 3.75  | 1.94E-04 | 2.78E-02 | 11 |
| GO:0050778                         | - positive regulation of immune response             | 3.08  | 3.27E-04 | 4.04E-02 | 13 |
| GO:0002253                         | ➤ activation of immune response                      | 3.88  | 7.12E-05 | 1.61E-02 | 12 |
| GO:0002757                         | - immune response-activating signal transduction     | 4     | 1.11E-04 | 1.93E-02 | 11 |
| GO:0002682                         | ➤ regulation of immune system process                | 3.44  | 5.88E-09 | 9.30E-05 | 28 |
| GO:0002684                         | ➤ positive regulation of immune system process       | 2.83  | 1.68E-04 | 2.56E-02 | 16 |
| <b>Cell death related GO terms</b> |                                                      |       |          |          |    |
| GO:0008219                         | Cell death                                           | 2.98  | 9.34E-05 | 1.87E-02 | 16 |
| GO:0010941                         | ➤ regulation of cell death                           | 2.5   | 8.19E-05 | 1.75E-02 | 21 |
| GO:0012501                         | ➤ programmed cell death                              | 3.08  | 6.37E-05 | 1.53E-02 | 16 |
| GO:0006915                         | - apoptotic process                                  | 4.52  | 4.90E-05 | 1.26E-02 | 15 |
| GO:0110089                         | - regulation of hippocampal neuron apoptotic process | 99.98 | 3.63E-04 | 4.29E-02 | 2  |
| GO:2001233                         | - regulation of apoptotic signaling pathway          | 4.49  | 2.10E-04 | 2.91E-02 | 9  |



**Table S7. Correlation between gene expressions and confounding variables in the total fraction**

| <b>Variables</b> | <b>RASD1</b>      | <b>H1FX</b>       | <b>SYN1</b>       | <b>IGFBP4</b>     | <b>SYN2</b>      | <b>HPSD1</b>      | <b>RBBP4</b>       | <b>ZFN32</b>      |
|------------------|-------------------|-------------------|-------------------|-------------------|------------------|-------------------|--------------------|-------------------|
| Age              | r=0.049<br>p=0.86 | r=0.16<br>p=0.57  | r=0.39<br>p=0.15  | r=-0.04<br>p=0.87 | r=0.18<br>p=0.52 | r=-0.02<br>p=0.92 | r=0.12<br>p=0.65   | r=-0.17<br>p=0.54 |
| PMI              | r=0.01<br>p=0.97  | r=-0.08<br>p=0.77 | r=-0.14<br>p=0.61 | r=0.12<br>p=0.67  | r=0.21<br>p=0.44 | r=0.24<br>p=0.39  | r=-0.003<br>p=0.99 | r=-0.22<br>p=0.41 |
| Brain pH         | r=-0.25<br>p=0.39 | r=0.13<br>p=0.64  | r=0.14<br>p=0.62  | r=-0.19<br>p=0.49 | r=0.07<br>p=0.79 | r=-0.49<br>p=0.06 | r=-0.44<br>p=0.10  | r=-0.17<br>p=0.55 |
| Sex              | t=1.3<br>p=0.19   | t=0.83<br>p=0.42  | t=1.2<br>p=0.24   | t=1.4<br>p=0.17   | t=0.91<br>p=0.38 | t=1.4<br>p=0.17   | t=1.1<br>p=0.27    | t=0.20<br>p=0.84  |
| Alcohol Abuse    | t=0.26<br>p=0.79  | t=1.41<br>p=0.18  | t=0.68<br>p=0.51  | t=1.44<br>p=0.17  | t=1.26<br>p=0.23 | t=1.07<br>p=0.30  | t=4.38<br>p=0.001  | t=2.25<br>p=0.04  |
| Antidepressant   | t=1.2<br>p=0.22   | t=0.63<br>p=0.53  | t=0.006<br>p=0.99 | t=0.32<br>p=0.75  | t=0.13<br>p=0.89 | t=0.72<br>p=0.48  | t=0.07<br>p=0.95   | t=0.12<br>p=0.91  |

Values denote p-value. Ct: control, MDD: Major Depressive Disorder, dlPFC: Dorsolateral prefrontal cortex, PMI: postmortem interval, miR: microRNA. The asterisk indicates a statistically significant correlation ( $p < 0.05$ ).

**Table S8. Correlation between gene expressions and confounding variables in the synaptic fraction**

| <b>Variables</b> | <b>TLR2</b>       | <b>ELK1</b>      | <b>ZFP36</b>      | <b>IRF1</b>       | <b>HES5</b>       | <b>ASPDH</b>      | <b>CYB561D1</b>    | <b>FUT9</b>       |
|------------------|-------------------|------------------|-------------------|-------------------|-------------------|-------------------|--------------------|-------------------|
| Age              | r=-0.06<br>p=0.85 | r=0.18<br>p=0.55 | r=-0.30<br>p=0.34 | r=0.12<br>p=0.72  | r=-0.14<br>p=0.63 | r=-0.01<br>p=0.96 | r=-0.01<br>p=0.96  | r=0.001<br>p=0.99 |
| PMI              | r=-0.32<br>p=0.29 | r=-0.001<br>p=1  | r=-0.30<br>p=0.34 | r=0.05<br>p=0.87  | r=0.20<br>p=0.47  | r=-0.23<br>p=0.41 | r=0.23<br>p=0.41   | r=0.28<br>p=0.32  |
| Brain pH         | r=0.09<br>p=0.77  | r=0.24<br>p=0.43 | r=-0.24<br>p=0.45 | r=-0.19<br>p=0.56 | r=-0.18<br>p=0.52 | r=-0.07<br>p=0.81 | r=0.15<br>p=0.60   | r=-0.19<br>p=0.51 |
| Sex              | t=0.98<br>p=0.34  | t=1.2<br>p=0.25  | t=0.87<br>p=0.40  | t=0.77<br>p=0.45  | t=0.92<br>p=0.37  | t=1.6<br>p=0.13   | t=0.50<br>p=0.62   | t=1.1<br>p=0.26   |
| Antidepressant   | t=0.35<br>p=0.73  | t=0.63<br>p=0.54 | t=0.13<br>p=0.89  | t=1.4<br>p=0.19   | t=0.61<br>p=0.55  | t=0.52<br>p=0.61  | t=0.16<br>p=0.87   | t=1.5<br>p=0.14   |
| Alcohol Abuse    | t=0.99<br>p=0.34  | t=1.05<br>p=0.31 | t=0.79<br>p=0.69  | t=1.10<br>p=0.29  | t=1.98<br>p=0.07  | t=.35<br>p=0.73   | t=0.2.19<br>p=0.05 | t=1.59<br>p=0.13  |

Values denote p-value. Ct: control, MDD: Major Depressive Disorder. PMI: postmortem interval. The asterisk indicates a statistically significant correlation ( $p < 0.05$ ).

**Table S9. Synaptic/total fraction ratio of genes in control subjects (top and bottom 20)**

| Gene symbol                                  | Ensembl ID           | Synaptosome/total fraction ratio | Chromosomal location      | Strand |
|----------------------------------------------|----------------------|----------------------------------|---------------------------|--------|
| <b>The ratio of enrichment genes top 20</b>  |                      |                                  |                           |        |
| EPDR1                                        | ENSG00000086289.11_3 | 8.869108                         | chr7:37723446-37991543    | +      |
| AC025594.2                                   | ENSG00000272899.3_4  | 7.371736                         | chr7:128506362-128512098  | +      |
| PMP2                                         | ENSG00000147588.6_2  | 7.325013                         | chr8:82352561-82359758    | -      |
| LYNX1                                        | ENSG00000180155.19_2 | 7.18706                          | chr8:143852615-143859226  | -      |
| GIPC1                                        | ENSG00000123159.15_3 | 6.425831                         | chr19:14588572-14606961   | -      |
| E2F1                                         | ENSG00000101412.12_2 | 4.523676                         | chr20:32263489-32274210   | -      |
| AC091959.3                                   | ENSG00000275740.1_3  | 4.492684                         | chr5:145583113-145718814  | +      |
| EBF4                                         | ENSG00000088881.20_3 | 3.781456                         | chr20:2673524-2740754     | +      |
| GJC2                                         | ENSG00000198835.3_2  | 3.732905                         | chr1:228337553-228347527  | +      |
| TMEM189-UBE2V1                               | ENSG00000124208.16_3 | 3.572151                         | chr20:48697661-48770174   | -      |
| C1QA                                         | ENSG00000173372.16_3 | 3.543936                         | chr1:22962999-22966101    | +      |
| FIP1L1                                       | ENSG00000145216.15_3 | 3.511716                         | chr4:54243810-54327028    | +      |
| CAVIN1                                       | ENSG00000177469.12_3 | 3.456352                         | chr17:40554470-40575535   | -      |
| DZIP1                                        | ENSG00000134874.17_2 | 3.447099                         | chr13:96230456-96296957   | -      |
| FLII                                         | ENSG00000177731.15_2 | 3.377484                         | chr17:18148150-18162230   | -      |
| OGDH                                         | ENSG00000105953.14_2 | 3.082193                         | chr7:44646171-44748665    | +      |
| DYSF                                         | ENSG00000135636.13_2 | 2.67007                          | chr2:71680852-71913898    | +      |
| POLR2J2                                      | ENSG00000267645.5_3  | 2.619659                         | chr7:102277496-102312088  | -      |
| GINM1                                        | ENSG00000055211.12_2 | 2.53371                          | chr6:149887430-149912884  | +      |
| INO80B-WBP1                                  | ENSG00000274049.4_3  | 2.489328                         | chr2:74682215-74688011    | +      |
| <b>The ratio of depleted genes bottom 20</b> |                      |                                  |                           |        |
| C1orf64                                      | ENSG00000183888.4_2  | 0.251085                         | chr1:16330731-16335302    | +      |
| GIMAP7                                       | ENSG00000179144.4_2  | 0.249776                         | chr7:150211918-150218161  | +      |
| ACVRL1                                       | ENSG00000139567.12_2 | 0.248565                         | chr12:52300692-52317145   | +      |
| GIT2                                         | ENSG00000139436.20_3 | 0.243924                         | chr12:110367597-110434194 | -      |
| FLT1                                         | ENSG00000102755.11_2 | 0.241182                         | chr13:28874481-29069282   | -      |
| ABCG2                                        | ENSG00000118777.10_3 | 0.232325                         | chr4:89011416-89152474    | -      |
| FGR                                          | ENSG00000000938.12_2 | 0.224675                         | chr1:27938575-27961788    | -      |
| CP                                           | ENSG00000047457.13_2 | 0.224644                         | chr3:148880197-148939842  | -      |

|                |                      |          |                          |   |
|----------------|----------------------|----------|--------------------------|---|
| TM4SF1         | ENSG00000169908.11_3 | 0.222281 | chr3:149086809-149095652 | - |
| ABCB1          | ENSG00000085563.14_2 | 0.218971 | chr7:87132949-87342639   | - |
| CDH5           | ENSG00000179776.17_3 | 0.218477 | chr16:66400525-66438689  | + |
| CXCL1          | ENSG00000163739.4_2  | 0.205596 | chr4:74735110-74736959   | + |
| EDN1           | ENSG00000078401.6_2  | 0.199844 | chr6:12290596-12297427   | + |
| POLR2J2        | ENSG00000228049.7_3  | 0.195706 | chr7:102305815-102312076 | - |
| AC004922.1     | ENSG00000284292.1_2  | 0.192021 | chr7:98923502-98992276   | + |
| LYNX1          | ENSG00000284505.1_1  | 0.188766 | chr8:143845752-143859640 | - |
| GINS1          | ENSG00000101003.9_2  | 0.182566 | chr20:25388363-25433264  | + |
| HIGD1B         | ENSG00000131097.6_2  | 0.179365 | chr17:42923721-42927848  | + |
| CSF3           | ENSG00000108342.12_2 | 0.172712 | chr17:38171614-38174066  | + |
| C7orf55-LUC7L2 | ENSG00000269955.2_3  | 0.137439 | chr7:139026106-139107345 | + |

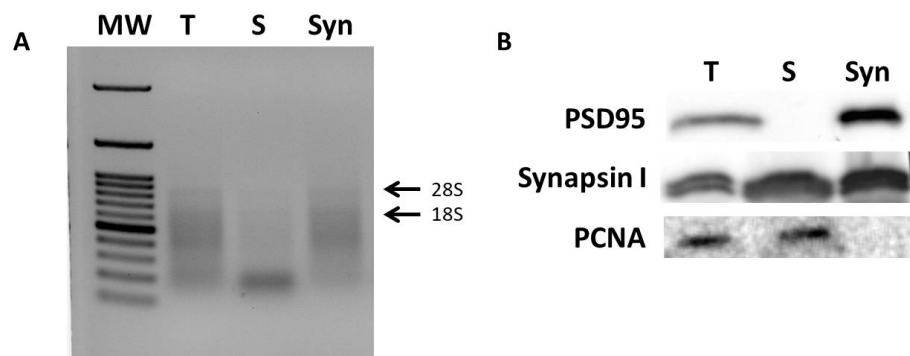

**Figure S1. Verification of RNA quality with gel electrophoresis and validation of synaptosome with Western Blot.** The result of western blot about validation tests and gel electrophoresis about isolated RNA. (A) An equal amount of RNAs (500 ng) was loaded in 0.8% TAE Agarose gel and stained with Ethidium Bromide. MW is 100bp plus ladder size marker. (B) An equal amount of proteins (20 ug) were loaded to subject to PAGE and blotted. MW, molecular weight; T, total fraction; S, S fraction; Syn, synaptosome.

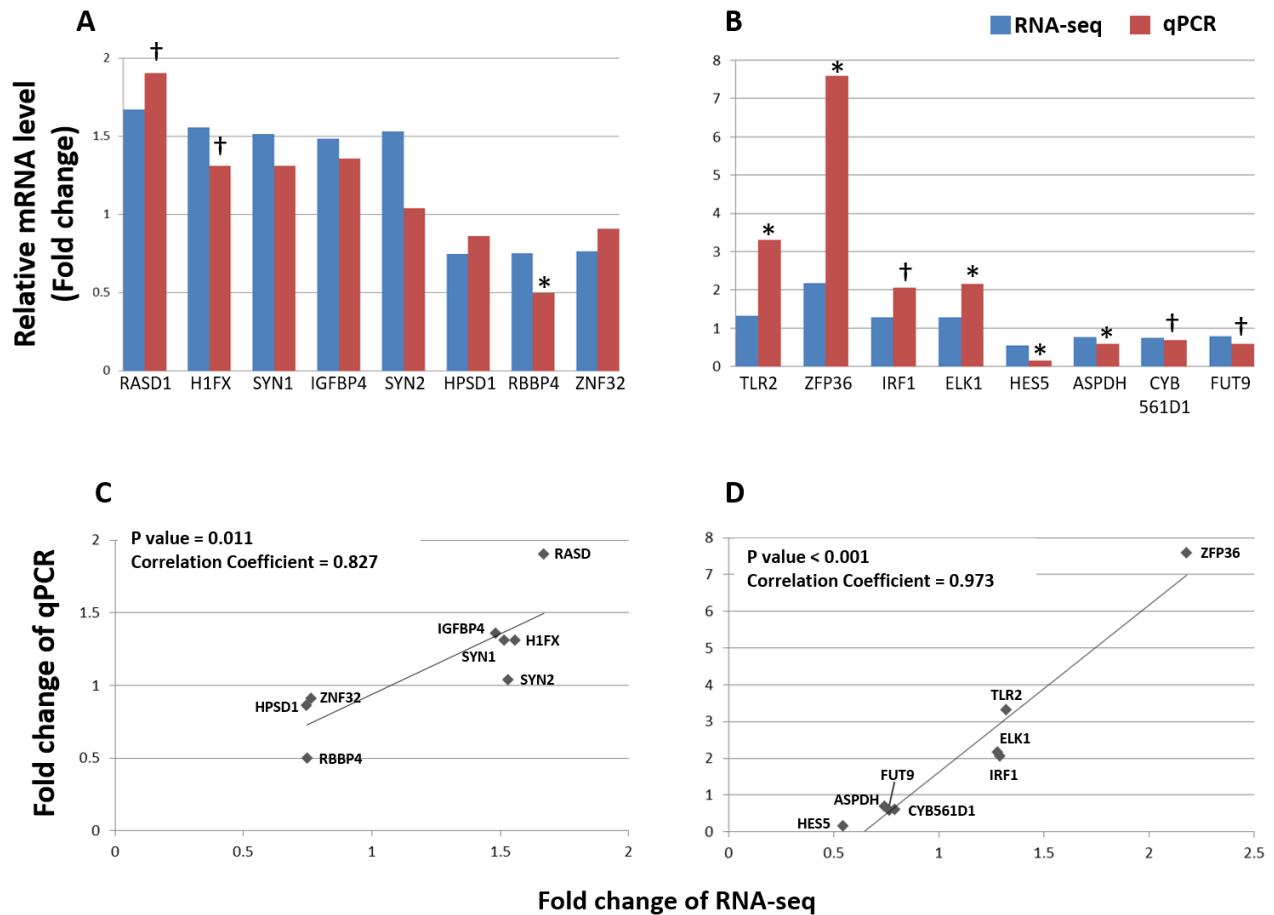

**Figure S2. The fold change comparison based on relative quantification of gene expression and scatter plot of correlation between fold change of RNA-seq and qPCR.** A) The gene expression differences measured by qPCR of total fraction are as follows: RASD1:  $t = -1.788$ ,  $df = 17.5$ ,  $p = 0.091$ ; H1FX:  $t = -1.948$ ,  $df = 28$ ,  $p = 0.061$ ; SYN1:  $t = -0.982$ ,  $df = 28$ ,  $p = 0.335$ ; IGFBP4:  $t = -1.598$ ,  $df = 21.3$ ,  $p = 0.125$ ; SYN2:  $t = -0.128$ ,  $df = 28$ ,  $p = 0.899$ ; HPSD1:  $t = 0.801$ ,  $df = 28$ ,  $p = 0.430$ ; RBBP4:  $t = 2.433$ ,  $df = 16.3$ ,  $p = 0.027$ ; ZNF32:  $t = 0.787$ ,  $df = 28$ ,  $p = 0.438$ . B) The gene expression differences measured by qPCR of synaptic fraction are as follows: TLR2:  $t = -2.592$ ,  $df = 12.5$ ,  $p = 0.023$ ; ZFP36:  $t = -2.411$ ,  $df = 13.1$ ,  $p = 0.031$ ; IRF1:  $t = -1.923$ ,  $df = 14.5$ ,  $p = 0.074$ ; ELK1:  $t = -3.220$ ,  $df = 19.3$ ,  $p = 0.004$ ; HES5:  $t = 2.795$ ,  $df = 14.2$ ,  $p = 0.014$ ; ASPDH:  $t = 2.593$ ,  $df = 28$ ,  $p = 0.015$ ; CYB561D1:  $t = 1.754$ ,  $df = 28$ ,  $p = 0.090$ ; FUT9:  $t = 1.825$ ,  $df = 28$ ,  $p = 0.079$ . Values denote average  $\pm$  SEM. ‘a’ denotes the statistical significance between control and MDD subjects. ( $n=15$  in control,  $n=15$  in MDD; outliers excluded). The geometric mean (GAPDH, ACTB, and 18s rRNA) was used as normalizer. \*  $p < 0.05$ , †  $p < 0.01$ . The scatter plot of correlation between fold change of qPCR and RNA-seq in total fraction (C) and synaptic fraction (D). X-axis indicates the fold change of RNA-seq, while Y-axis shows that of qPCR data (MDD/Ct). MDD, Major Depressive Disorder

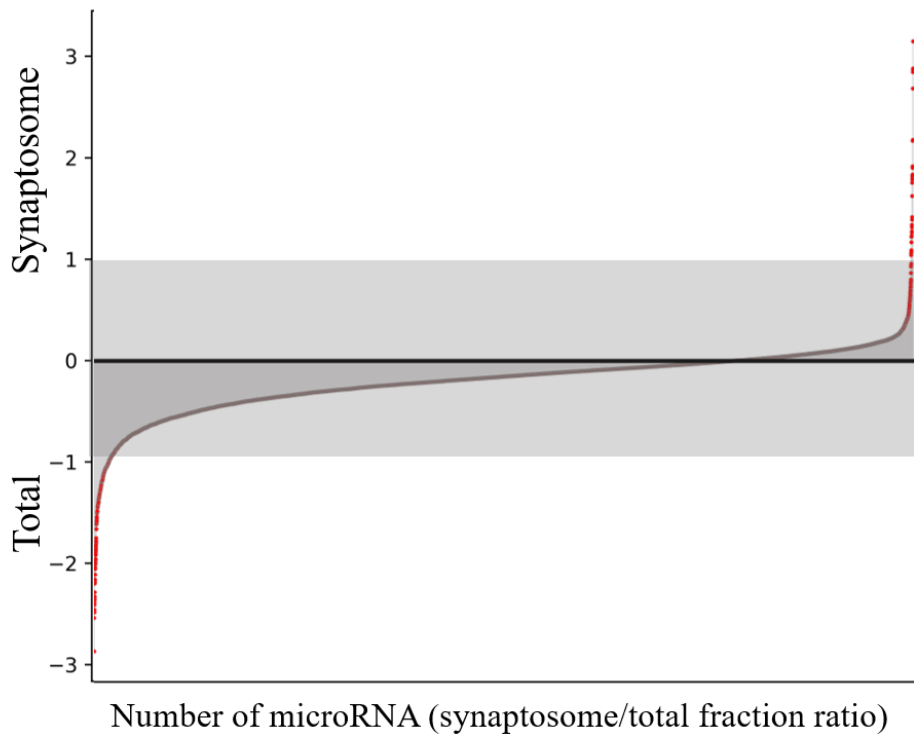

**Figure S3. Enrichment ratios of synaptic fraction gene expression compared to total fraction.** Gene expressions ratio of synaptic/total fraction about control subjects as measured by RNA-seq. The synaptic/total ratio are shown as log(base=2) transformed values.

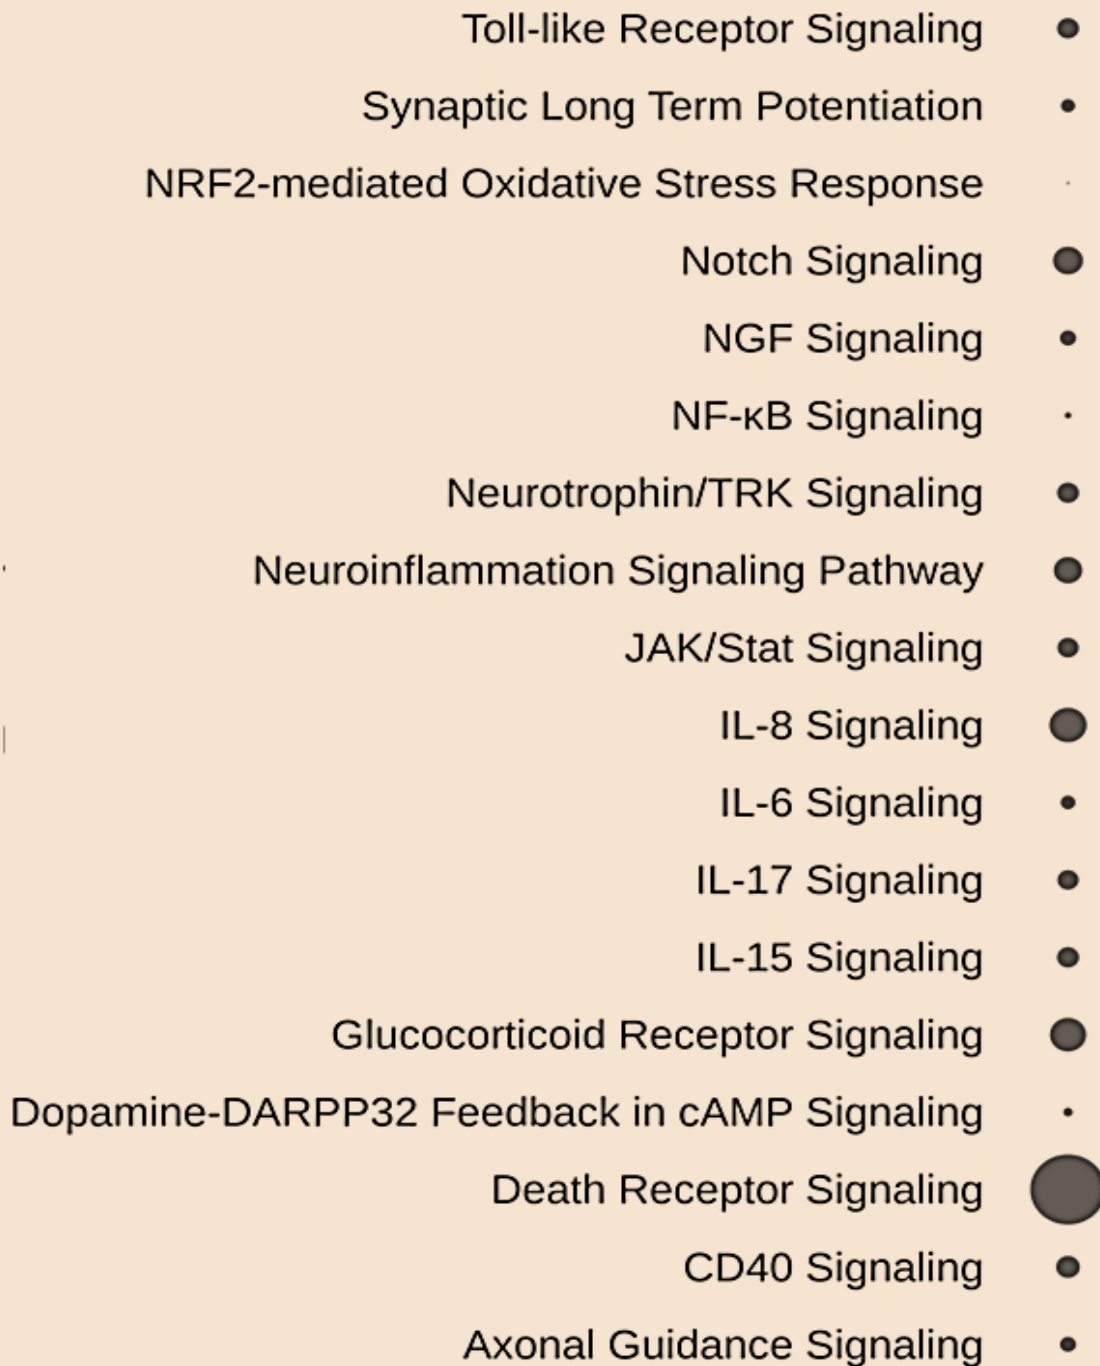

**Figure S4. The result of canonical pathway in significantly altered shift genes.** The analysis was performed by 119 shifted ratio genes (84 up and 35 down together). Spots/circles size is function of  $-\log(\text{base}=10)$  of fisher exact test enrichment p-value.
